# Supplementary material for: Healthcare access for children and families on the move and migrants
Source: PubMed Central journal article supplement — BMJ Paediatr Open. 2020 Apr 14;4(1):e000588. doi: 10.1136/bmjpo-2019-000588 (PMC7213513; doi:10.1136/bmjpo-2019-000588), 2020-04-14
Supplement: bmjpo-2019-000588.draft_revisions.pdf [file bmjpo-2019-000588.draft_revisions.pdf]

# BMJ Paediatrics Open

BMJ Paediatrics Open is committed to open peer review. As part of this commitment we make the peer review history of every article we publish publicly available.

When an article is published we post the peer reviewers' comments and the authors' responses online. We also post the versions of the paper that were used during peer review. These are the versions that the peer review comments apply to.

The versions of the paper that follow are the versions that were submitted during the peer review process. They are not the versions of record or the final published versions. They should not be cited or distributed as the published version of this manuscript.

BMJ Paediatrics Open is an open access journal and the full, final, typeset and author-corrected version of record of the manuscript is available on our site with no access controls, subscription charges or pay-per-view fees (<http://bmjpaedsopen.bmj.com>).

If you have any questions on BMJ Paediatrics Open's open peer review process please email [info.bmjpo@bmj.com](mailto:info.bmjpo@bmj.com)

# BMJ Paediatrics Open

## Healthcare access for children and families on the move and migrants

|                               |                                                                                                                                                                                                                                                                                                                                                                                                                                                         |
|-------------------------------|---------------------------------------------------------------------------------------------------------------------------------------------------------------------------------------------------------------------------------------------------------------------------------------------------------------------------------------------------------------------------------------------------------------------------------------------------------|
| Journal:                      | <i>BMJ Paediatrics Open</i>                                                                                                                                                                                                                                                                                                                                                                                                                             |
| Manuscript ID                 | bmjpo-2019-000588                                                                                                                                                                                                                                                                                                                                                                                                                                       |
| Article Type:                 | Original research                                                                                                                                                                                                                                                                                                                                                                                                                                       |
| Date Submitted by the Author: | 14-Oct-2019                                                                                                                                                                                                                                                                                                                                                                                                                                             |
| Complete List of Authors:     | Murphy, Lisa; Medact<br>Broad, Jonathan; Medact<br>Hopkinshaw, Bryony; Medact<br>Boutros, Sarah; University College London Institute of Child Health<br>Russell, Neal; University of London St George's Molecular and Clinical Sciences Research Institute<br>Firth, Alison; Royal College of Paediatrics and Child Health<br>McKeown, Rachael; Royal College of Paediatrics and Child Health<br>Steele, Alison; Great Ormond Street Hospital NHS Trust |
| Keywords:                     | Paediatric Practice, Ethics, Children's Rights, Health Service                                                                                                                                                                                                                                                                                                                                                                                          |
|                               |                                                                                                                                                                                                                                                                                                                                                                                                                                                         |

SCHOLARONE™  
Manuscripts

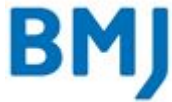

I, the Submitting Author has the right to grant and does grant on behalf of all authors of the Work (as defined in the below author licence), an exclusive licence and/or a non-exclusive licence for contributions from authors who are: i) UK Crown employees; ii) where BMJ has agreed a CC-BY licence shall apply, and/or iii) in accordance with the terms applicable for US Federal Government officers or employees acting as part of their official duties; on a worldwide, perpetual, irrevocable, royalty-free basis to BMJ Publishing Group Ltd ("BMJ") its licensees and where the relevant Journal is co-owned by BMJ to the co-owners of the Journal, to publish the Work in this journal and any other BMJ products and to exploit all rights, as set out in our [licence](#).

The Submitting Author accepts and understands that any supply made under these terms is made by BMJ to the Submitting Author unless you are acting as an employee on behalf of your employer or a postgraduate student of an affiliated institution which is paying any applicable article publishing charge ("APC") for Open Access articles. Where the Submitting Author wishes to make the Work available on an Open Access basis (and intends to pay the relevant APC), the terms of reuse of such Open Access shall be governed by a Creative Commons licence – details of these licences and which [Creative Commons](#) licence will apply to this Work are set out in our licence referred to above.

Other than as permitted in any relevant BMJ Author's Self Archiving Policies, I confirm this Work has not been accepted for publication elsewhere, is not being considered for publication elsewhere and does not duplicate material already published. I confirm all authors consent to publication of this Work and authorise the granting of this licence.

# Healthcare access for children and families on the move and migrants

Corresponding author:

Dr. Lisa Murphy

Email: lisaanna.murphy@gmail.com

Phone: +447935994073

Postal address: 1/2 48 Dinmont Road, Glasgow, G41 3UL

This research has been carried out, analysed and authored by five child health professionals and two members of staff of the Royal College of Paediatrics and Child Health:

Dr. Lisa Murphy (corresponding author), Fellow in Public Health, Medact, UK

Dr. Jonathan Broad, Paediatric SHO, Medact, UK

Dr. Bryony Hopkinshaw, Paediatric Registrar, Medact, UK

Dr. Sarah Boutros, Paediatric Registrar, University College London Institute of Child Health, UK

Dr. Neal Russell, Paediatric Registrar, St. George's University Hospital, UK

Ms. Alison Firth, Royal College of Paediatrics and Child Health, UK

Ms. Rachael McKeown, Royal College of Paediatrics and Child Health, UK

Dr. Alison Steele, Great Ormond Street Children's Hospital, UK

**COI:** None of the authors have any conflicts of interest to report. This research received no funding or other material support from any external source. All authors meet the ICMJE requirements for authorship.

**Key words:** child health services, clinical ethics, public health, health systems, human rights, inequalities

**Word count:** 4394

**Reference count:** 22

## Abstract

**Background:** United Kingdom (UK) National Health Service (NHS) charging regulations have increasingly restricted migrants' healthcare access, as part of the government's intention to create a 'hostile environment' for migrants. With an estimated 144,000 undocumented children living in the UK and increasing public concern that these regulations are negatively impacting migrant health and wellbeing, as well as contravening international child rights agreements, it has become imperative to understand their implications.

**Methodology:** A mixed methods digital survey was disseminated through communications channels of the Royal College of Paediatrics and Child Health (RCPCH) to their members. Quantitative data were analysed on Stata, and basic proportions were calculated for each response proportion. Qualitative data were analysed using a framework analysis approach.

**Results:** There were 220 responses, from a range of healthcare professional backgrounds. The majority were not confident in interpreting and applying the charging regulations. 34% reported examples of the charging regulations impacting patient care, analysis of which elicited 7 key themes. Our survey gathered 18 cases of migrants being deterred from accessing healthcare, 11 cases of healthcare being delayed or denied outright and 12 cases of delay in accessing care leading to worse health outcomes, including 2 intrauterine deaths.

**Discussion:** Our results describe a range of harms arising from the current NHS charging regulations contributing to delays in or denials of healthcare, due to fear of charging or immigration enforcement and confusion around entitlements. This harm affects individual patients, the migrant community and the NHS – often in multiple simultaneous ways. Many patients eligible for NHS care, such as trafficking victims, are not being identified as such. We found the current charging regulations to be unworkable and that harm could not be eliminated simply through improved awareness or implementation.

## What is already known

- Excluding certain migrant groups from healthcare access often results in greater health system costs, as demonstrated in several EU studies.
- The NHS charging regulations are a deterrence to healthcare access for certain migrant groups and are a source of harm to individual patients and to public health, as reported by Maternity Action, Doctors of the World, and the British Medical Association. Most of the evidence relates to pregnant women and other adult migrant populations, and is often focused around a number of high profile cases.
- NHS charging regulations are putting a strain on healthcare professionals at a time of already stretched services.

## What this study adds

- The NHS charging regulations are having direct and indirect impacts on migrant children and pregnant women, with evidence of a broad range of harms.
- There is a lack of understanding of current NHS charging regulations and their intended application amongst healthcare staff.
- The NHS charging regulations are unworkable and are having a detrimental impact on the wider health system, as well as conflicting with its staff's professional and ethical responsibilities.

## Background

Recent NHS charging regulations have increasingly restricted access to the United Kingdom (UK) National Health Service (NHS) for migrants, particularly in England<sup>1</sup>. They have been introduced as part of the government's stated intention of creating a 'hostile environment' for undocumented migrants in the UK by embedding immigration control within, and restricting access to public services<sup>2</sup>. In this context, and in light of the UK's commitment to uphold the 'highest attainable standard of health' for all children under the UN Convention on the Rights of the Child (UNCRC)<sup>3</sup>, it has become imperative to understand the impact of the NHS charging regulations (see appendix 1) on migrant children and their families.

The 2014 Immigration Act<sup>4</sup>, changed the definition of 'ordinarily resident' (the condition upon which eligibility for free NHS care depends) and thereby further restricted access to the NHS for people with irregular immigration status<sup>5</sup>. Since then, the charging regulations of 2015 and 2017<sup>1</sup> include: i) charging for most secondary and community care; ii) charging at 150% of the NHS tariff for chargeable patients iii) upfront charging before treatment is provided (unless urgent and immediately necessary); and iv) debts of >£500 being reported to the Home Office. Certain patient groups, such as asylum seekers, refugees, victims of trafficking recognised by the National Referral Mechanism (NRM), and children looked after by the local authority, are exempt from charging. Additionally, some infectious diseases, notifiable infections, and conditions which arise as a result of violence (domestic, sexual, torture, FGM) are also exempt<sup>1</sup>. Care given in Emergency Departments and in Primary Care currently remains free of charge for all, although extension of charging into these services has been proposed<sup>6</sup>.

Undocumented migrants in the UK, estimated to be around 618,000 (including 144,000 children)<sup>7</sup>, are also facing increasing immigration application fees and cuts to legal aid<sup>8</sup>. The majority of these individuals cannot access employment, rent, or any mainstream welfare benefits<sup>7</sup>. It is therefore increasingly difficult to regularise their immigration status thus driving families and children further into destitution<sup>7</sup>. Being in such precarious situations puts migrants at further risk of exploitation, domestic violence, and modern slavery. This is especially concerning for children, as their immigration status generally depends on their parents'.

Several medical colleges, including the Royal College of Paediatrics and Child Health (RCPCH) have publicly stated their concern on the impact of these regulations on migrant health and wellbeing<sup>9</sup>. As a team of child health professionals, we therefore wished to investigate this impact in relation to the population we care for. We collaboratively conducted a survey of frontline professionals, with the RCPCH policy team, on their views and experiences of NHS charging for children and pregnant women. The survey aimed to understand healthcare professionals' knowledge of and attitudes to NHS charging regulations and to understand the impacts of the charging regulations and wider migration policy changes in practice. This paper presents the survey findings.

## Methodology

### **Ethical approval**

Consultation of the Health Research Authority and Medical Research Council ethical approval decision tool found that NHS Research Ethics Service approval was not required for this research in any of the four nations of the United Kingdom.

### **Survey Design**

A mixed methods digital survey was developed by five clinicians and further refined following review by experienced RCPCH researchers. The survey (published in full in appendix 2) was designed for adaptability and comparison with other medical specialties and patient populations. The survey included 12 Likert scale questions and five binary yes/no questions intended to measure practitioners' attitudes towards, and understanding of, policies restricting healthcare access eligibility in migrant groups. It also included three qualitative free text questions, investigating themes of deterrence and delay of healthcare, as well as the wider impacts of hostile policies on migrant children and pregnant women.

### **Recruitment & participants**

The survey was open to participation to all children's health practitioners working in the UK, including paediatricians, healthcare students, midwives, nurses, other doctors, and child health specialists. A variety of recruitment methods were utilised. RCPCH members were emailed via four email bulletins: to those members on specific mailing lists for research and clinical leads, then once to the entire membership who consented to emails (14,598 emails sent in total). Recruitment texts were all within a wider email bulletin including unrelated content. It was also shared five times on a social media platform (Twitter), on which 17,000 people were followers at the time. The proportion of email recipients who are on multiple email lists, or who also engage with the college's Twitter channel is unknown. A targeted recruitment method was also adopted in two London teaching hospitals with large paediatrics departments. In these hospitals, members of paediatrics departments also received an additional email and two researchers orally announced the surveys in departmental meetings (to approximately 500 staff and students).

### **Data collection**

The survey collection period was two months (January - February 2019) in which participants could submit their responses. Participants could submit their responses anonymously either via an online tool (Survey Monkey) using computers or other handheld devices, or in paper format into sealed boxes left in hospital departments.

### **Data analysis**

Quantitative data were analysed on Stata, and basic proportions were calculated for each response proportion. Non-responders were not included in the denominator, therefore the proportion presented is in relation to number of responses per question, not overall participants. Qualitative data were analysed using a framework analysis approach<sup>10</sup>. JB and LM reviewed the data separately, then devised a coding framework independently, then formed a framework by consensus, with overall themes and sub-codes that had an agreed definition. This framework

was then applied independently by LM and two researchers who had not developed the framework (RM and BH). The framework that was developed can be found in appendix 3.

### Patient or public involvement

No patients or public were involved in the design or conduct of this research. This was not thought pertinent for our research at this time, as we were seeking to understand healthcare professionals' experiences. Additionally, as those affected by the charging regulations are often in precarious situations in the UK, they are often understandably reluctant to participate in research or publicly describe their stories.

## Results

### Quantitative Results

In total there were 220 responses to the consultation, however twenty respondents only inputted their profession and location without responding to any other question on the survey. They were thus excluded from subsequent analysis. A range of professionals were included in the survey including midwives, nurses, allied health professionals, medical students and charity workers, with doctors being the most numerous (44.5%), comprising paediatric consultants, trainees, general practitioners, and trust grade doctors. All four nations were represented, although 69.5% respondents were from Greater London.

### Figure 1: Survey respondents' demographics, showing their professional role (n=200)

The majority of professionals (53%) strongly disagreed or disagreed that they were confident in the definition of urgent and immediately necessary care. In all questions, the majority of professionals strongly disagreed or disagreed that they were confident in determining which circumstances, conditions and groups patients would be charged in, either upfront or in retrospect. Respondent answers to these Likert scale questions are detailed in table 1.

**Table 1: Knowledge of/confidence in the charging regulations amongst respondents**

| "I am confident in determining/my knowledge of".... |                   |          |          |          |                |       |
|-----------------------------------------------------|-------------------|----------|----------|----------|----------------|-------|
|                                                     | Strongly disagree | Disagree | Neutral  | Agree    | Strongly agree | Total |
| How to define urgent/immediately necessary          | 56 (29%)          | 45 (24%) | 42 (22%) | 37 (19%) | 10 (5%)        | 190   |



|                                |          |          |          |          |         |     |
|--------------------------------|----------|----------|----------|----------|---------|-----|
| How to advocate for patients   | 47 (36%) | 32 (25%) | 25 (19%) | 16 (12%) | 9 (7%)  | 129 |
| When to charge retrospectively | 64 (51%) | 34 (27%) | 15 (12%) | 6 (5%)   | 6 (5%)  | 125 |
| When to charge upfront         | 63 (50%) | 33 (26%) | 13 (10%) | 10 (8%)  | 6 (5%)  | 125 |
| Which services exempt          | 73 (38%) | 50 (26%) | 32 (17%) | 23 (12%) | 12 (6%) | 190 |
| Which conditions exempt        | 94 (50%) | 48 (26%) | 19 (10%) | 21 (11%) | 5 (3%)  | 187 |
| Which patients exempt          | 67 (52%) | 33 (26%) | 10 (8%)  | 12 (9%)  | 6 (5%)  | 128 |
| Which patients chargeable      | 61 (32%) | 58 (31%) | 43 (23%) | 19 (10%) | 9 (5%)  | 190 |

Most respondents (60%) felt that the policies of charging migrants for NHS care was unfair, and the majority felt that healthcare professionals should not play a role in implementing charging (58%). The majority of respondents were not confident that they would be covered by their indemnity providers (81% not confident) or the GMC (87% not confident) in case of harm coming to a patient as a result of charging (see table 2).

**Table 2: Opinions of indemnity and GMC coverage in relation to patient harm resulting from charging regulations amongst respondents**

| “I am confident that [xxx] would provide me with protection if a patient under my care had their healthcare delayed/ withheld as a result of the regulations” |                   |          |         |       |                |       |
|---------------------------------------------------------------------------------------------------------------------------------------------------------------|-------------------|----------|---------|-------|----------------|-------|
|                                                                                                                                                               | Strongly Disagree | Disagree | Neutral | Agree | Strongly Agree | Total |
|                                                                                                                                                               |                   |          |         |       |                |       |

|                    |          |          |          |        |        |     |
|--------------------|----------|----------|----------|--------|--------|-----|
| Indemnity coverage | 79 (62%) | 24 (19%) | 16 (13%) | 6 (5%) | 3 (2%) | 128 |
| Protection by GMC  | 89 (70%) | 22 (17%) | 7 (5%)   | 7 (5%) | 3 (2%) | 128 |

There was a lack of awareness of the Department of Health and Social Care's review into the impact of the charging regulations among respondents, as 71% of respondents were not aware of the review, which took place in 2017. However, 76% reported they felt that there was a need for an independent review of these regulations.

12.4% of respondents had received training on this topic (n=178), whilst 72.3% (n=112) would like to receive further training.

## Qualitative Results

34% of respondents reported that they knew of examples of how NHS charging regulations had impacted patient health and care. They were subsequently asked to describe these known cases under three themes: 'healthcare seeking', 'healthcare withheld' and 'wider impact of charging'. Review of the thematic coding following development of the analysis framework elicited seven key themes (detailed definitions of which are in appendix 4) within which the free text answers could be grouped, with several responses cross cutting several themes.

### Theme 1 - Fear of consequences of engagement in healthcare.

At least 19 cases detailed of patients and families afraid to come into contact with health services, avoiding attendance or disengaging from care. A recurring narrative was that of fear of receiving unaffordable bills for healthcare. At least six women were reported as having presented late in pregnancy or in labour due to fear of charging. Seven of our respondents detailed a fear of deportation as a consequence of accessing healthcare. Healthcare facilities were seen as being complicit in information sharing with other government agencies, and as such patients were deterred from care due to fear of data sharing, and potential deportation and criminalisation. One respondent detailed that *"Patients at my hospital frequently do not attend with their children as they have overstayed their visa and fear deportation if they come to our attention."*

### Theme 2 - Deterrence from healthcare.

Our survey found 18 cases of migrants being deterred from accessing healthcare, including preventative measures such as screening. Respondents raised concern that the charging regulations were leading to racial profiling, having witnessed non caucasian patients being asked to 'prove' their eligibility at a higher rate. Respondents expressed concern that healthcare seeking in this group is already low, and that the charging regulations could be exacerbating this. One answer described experiencing *"Patients presenting to accident and emergency, late,*

1  
2  
3 where migration status was one factor contributing. Profiling leading to all sorts of people being  
4 deterred e.g. both migrants and people with learning disabilities who now feel they need a  
5 passport to access care”, with several responses detailing ‘pregnant women avoiding antenatal  
6 care for fear of the huge bill and their details being shared with Home Office”. Respondents also  
7 highlighted that individual cases could resonate throughout migrant communities, with one case  
8 of charging or hostility causing widespread fear of accessing healthcare.  
9  
10

### 11 **Theme 3** - Delay in or denial of healthcare provision.

12 Our survey gathered 11 cases of pregnant women and children having healthcare delayed or  
13 denied outright due to the current charging regulations. One case reported in our survey was of  
14 a ‘2 year old boy in UK on government resettlement scheme (with full refugee status) turned away from  
15 outpatient hospital appointment for review’. In some cases, this was because care was not deemed  
16 ‘urgent or immediately necessary’, or there was disagreement between healthcare professionals  
17 on the level of care which should be provided. In others, a lack of knowledge of exemptions to  
18 charging meant that patients had their care delayed or denied. The potential impact of this was  
19 outlined by one respondent: “Treatments that were not immediately life-saving but that were  
20 potentially life-prolonging and disability-sustaining withheld for days-weeks whilst entitlement to  
21 NHS care clarified”. The issue of when eligibility was assessed came up in several responses,  
22 with non-clinical staff acting as ‘gatekeepers’ to care. Cases reported in our survey covered a  
23 wide range of clinical scenarios, including children with cancer, with one example where a ‘child  
24 visiting UK presented with leukaemia required intensive care treatment and to start  
25 chemotherapy. Had eu passport but resident in Africa. Hospital unwilling to start chemotherapy  
26 until £80k deposit funds provided therefore treatment delayed’, congenital conditions and those  
27 requiring surgery.  
28  
29  
30  
31  
32

### 33 **Theme 4** - Impact of charging regulations on patient health outcomes.

34 Our respondents detailed at least twelve cases of delay in accessing or receiving healthcare  
35 leading to potentially avoidable health complications or poor outcomes. This includes two cases  
36 of intrauterine death in pregnant women who had been deterred from accessing antenatal care.  
37 Four respondents told of children presenting in critical condition due to a delay in attendance,  
38 with one saying ‘I’ve seen children being brought to ED very sick / not having consulted the gp before  
39 because of concerns about this. Also we often see young children which have other health or dental  
40 problems discovered incidentally as they have not sought care because of this’. In many cases, the  
41 patient’s length of stay was extended due to late presentation leading to increased care  
42 requirements. One case described a child “born with a severe and life limiting condition which  
43 could have been detected antenatally if she had received antenatal care at the right time in  
44 pregnancy”, another described the case of an unwell child where the ‘case needed to be  
45 reviewed by specialist centre to determine treatment options, but they refused to see her as ‘not  
46 eligible for nhs care’...Case was clearly immediately necessary and she should have been seen  
47 regardless. My colleague was able to go back to specialist hospital to advocate for patient and  
48 they eventually saw her after an unnecessary delay to her care’. There was also disengagement  
49 from, or non-compliance with, prescribed care reported, due to fear of charging or immigration  
50 enforcement.  
51  
52  
53  
54  
55  
56  
57  
58  
59  
60

**Theme 5** - Current charging regulations unworkable.

Many respondents told of difficulty in understanding and implementing the current charging regulations, due to difficulty interpreting ambiguous language, issues determining eligibility and lack of coordination between clinical and non-clinical staff. There were numerous cases of eligible patients being inappropriately billed or threatened with billing, with one respondent saying *'We know that twice as many people that were technically under these regulations got sent bills than were actually required to pay them.'* It was highlighted that not only is knowledge of exemptions to charging low, they can be hard to identify. One case told of a woman who *"had been trafficked into the UK, and her 'partner' had all her documents which she could not access, suggesting she may have been in modern day slavery. She was also being domestically abused. All these criteria could have identified her as exempt from charging, but they were not identified until after the baby was born."* Respondents reported frustration that administrative staff would act independently of clinicians, for example visiting patients on wards to assess eligibility or collect payment for care. In two cases they brought bills to families on clinical wards, causing confusion and distress about whether a child was able to continue receiving care.

**Theme 6** - Impact of charging regulations on NHS.

Many respondents felt that the charging regulations were having an undue burden on our health system, and in particular on the staff working within it. Respondents stated that not only did it go against their professional duties as stated by their regulatory bodies, but against their own values and the principles of the NHS. This sentiment was encapsulated by one respondent who said *'I feel exorbitant charging for immigrant children and the undue delay getting things done (procuring equipment, getting consultations) for such children would create a bad reputation. As a doctor I feel stressed and immoral handling this'*. Clinicians told of going beyond their usual duties to help patients navigate the healthcare system and advocate on their behalf against inappropriate charging. They also detailed cases where the charging regulations led to an increased burden on NHS finances and resources, with noting that it was *'costly to the NHS as people often need emergency treatment and hospital treatment for a condition that was treatable earlier on'*.

**Theme 7** - Context of the wider hostile environment influencing health.

Respondents to our survey gave several examples of the hostile environment impacting on families, including exacerbating socioeconomic inequalities and preventing access to range of services. This ranged from affecting their access to education, to resulting in insecure access to food and shelter. In one reported instance, a *'Child with life limiting diagnosis... parents left them because they knew that unaccompanied children would get healthcare.'* Respondents also highlighted a lack of appreciation of health needs by immigration services, detailing that children could be placed in unsuitable accommodation or far away from the clinical team caring for them.

**Discussion**

The results of this survey describe a range of harms, arising from various aspects of current

1  
2  
3 NHS charging regulations contributing to delays in or denials of healthcare. The 'Three Delays'  
4 model proposes that delays in timely care can be explained by 1) delays in decision to seek  
5 care, 2) delays in accessing a health facility, 3) delays in receiving appropriate care at the  
6 facility<sup>12</sup>. This model was originally proposed to explain contributors to maternal mortality in low  
7 and middle income countries, but has been adapted to describe delays in other types of  
8 care<sup>13,14</sup>. Our survey results demonstrate the model's applicability to children and pregnant  
9 women being impacted by the Hostile Environment in the UK. Fear - particularly of charging and  
10 of deportation - and confusion around entitlements, are leading to delays in seeking care  
11 (themes 1 and 2). Delays in reaching a health facility may be occurring due to destitution and  
12 unsuitable housing locations (theme 7). Once patients reach hospital, delays are occurring due  
13 to confusions around eligibility or immigration status, or due to denial of care until payment is  
14 received (themes 3 and 5). As described in other settings, the three delays can each cause  
15 harm in isolation, but even more so when occurring in combination<sup>15</sup>. That patients may be  
16 being impacted in multiple simultaneous ways by the hostile environment could explain the  
17 extent of the harm described even within this relatively small survey. Importantly, our survey  
18 only reflects cases where there was an eventual, although delayed, attendance at a healthcare  
19 facility and does not capture harmful outcomes of migrants never accessing health services at  
20 all.  
21  
22  
23  
24  
25

26 In addition to demonstrating harm, our survey results suggest that the NHS Charging  
27 Regulations are poorly understood and poorly implemented. Our quantitative data demonstrated  
28 that clinicians' knowledge is low regarding exemptions that are meant to protect the most  
29 vulnerable. Qualitative responses suggest that many patients who would in reality be eligible for  
30 free care are not being identified as such, and are still having their access delayed or denied.  
31 Our survey highlighted several cases of trafficked victims being deterred and/or denied care,  
32 demonstrating how difficult it is in practice to implement the exemptions to charging, which exist  
33 to provide care for the most vulnerable and protect population health. Indeed, to identify those  
34 vulnerabilities, a good rapport needs to be built between patient and clinician. This is made  
35 almost impossible in the context of fear that surrounds these regulations.  
36  
37  
38

39 Despite overall understanding of charging regulations being low, several respondents  
40 highlighted their personal experience of acting as advocates for patients, for example in  
41 identifying exemptions, or by arguing that care is "urgent or immediately necessary" (which  
42 allows billing to be retrospective). This reliance on clinical resource for non-clinical activity may  
43 impact other areas of service delivery or put increased demands on an already overstretched  
44 healthcare workforce.  
45  
46  
47

48 Our results do not support the argument that harm could be eliminated simply through improved  
49 staff awareness or 'better' implementation of regulations. Many patients were described as  
50 deterred from making contact with healthcare services, meaning that harm has already occurred  
51 before there is opportunity for advocacy. Within the cases described, harms occurring before  
52 healthcare was sought included late presentation requiring intensive care management, and two  
53 intrauterine deaths. There were several descriptions in the survey of children presenting late in  
54 their illnesses directly to the Emergency Department, even though accessing primary care  
55  
56  
57  
58  
59  
60

1  
2  
3 earlier in their illness would not have been chargeable. This accords with the work done by the  
4 Equality and Human Rights Commission which suggests that it is not just specific restrictions,  
5 such as upfront charging, which act as a barrier to healthcare access, but the wider policies of  
6 the hostile environment<sup>16,17</sup>.  
7  
8

9 Another aspect of the unworkability of the charging regulations is the ethical dilemma in which it  
10 places clinicians. Most respondents felt that the charging regulations are unfair, and in free text  
11 responses many commented that they felt charging conflicted with their own beliefs or the  
12 perceived values of the NHS. The ethical issues are particularly stark when considering  
13 charging children and young people specifically. It would be likely to be considered a significant  
14 safeguarding issue if, through the actions of a parent or carer, a child were prevented from  
15 accessing treatment that is in their best interests<sup>18</sup>. Yet our survey documents multiple cases of  
16 children having such treatments delayed or denied due to charging. One respondent highlighted  
17 the impossible situation for a family whose child was being treated in intensive care: *"If the*  
18 *family had refused treatment we would have continued anyway in the best interest of the child*  
19 *even if it meant going to court. So in a way we were asking them to pay for something that was*  
20 *out of their control.... It was obviously a lot more than she was expecting or could afford, as [the*  
21 *mother] was distraught."* Moreover, the routine sharing of data with the UK border agency  
22 represents a breach of patient confidentiality and, whilst these regulations are being  
23 implemented, clinicians cannot guarantee confidentiality for their patients.  
24  
25  
26  
27  
28

29 The most significant limitation of this survey is the lack of the patients' voices. Unfortunately, as  
30 those affected are mostly in precarious situations in the UK, they are often scared and reluctant  
31 to participate in research or publicly describe their stories. Clinicians may have been more likely  
32 to respond if they had seen cases of charging in their practice or have pre-existing opinions on  
33 the topic, and this may have led to an overestimation in the percentage of clinicians who have  
34 seen charging in their practice. In the free text answers, respondents were instructed to keep  
35 cases vague to ensure patient confidentiality would not be breached - meaning that the full  
36 extent of the impact on those patients could not always be fully described. We also cannot  
37 exclude the possibility that where descriptions were very brief, two different clinicians may have  
38 been referring to the same patient case, although the researchers reviewing the data found that  
39 the descriptions of the cases largely did not suggest overlap.  
40  
41  
42  
43

44 The UK differs from comparable European countries, including France, Spain, Sweden and  
45 Italy, as being more restrictive in healthcare access for undocumented migrant children<sup>19</sup>. An  
46 exemption from charging for all children and pregnant women would bring the UK into line with  
47 neighbouring countries and reduce the significant safeguarding implications of the current  
48 policy. However, the evidence presented here suggests that reversing the charging regulations  
49 for children and pregnant women alone will not be sufficient to stop their impact on children.  
50 Even if children were exempt from NHS charging, these regulations and the presence of hostile  
51 environment policies may still stop families from bringing children for healthcare. Furthermore,  
52 even if children themselves can receive free healthcare, charging of their family members can  
53 lead to catastrophic health expenditure or avoidable disability which may cause or exacerbate  
54  
55  
56  
57  
58  
59  
60

1  
2  
3 destitution<sup>20</sup>.  
4

5  
6 Our results are convergent with previous research carried out by the Equality and Human Rights  
7 Commission, which looked at the existing evidence on access to healthcare for migrants in the  
8 UK<sup>18,19</sup>. The evidence in their reports is mostly drawn from focus group work with migrants, and  
9 from the reports of third sector organisations. There is a large overlap in key themes, particularly  
10 with regards to fear, staff misinterpretation of regulations acting as a barrier, and the outcome of  
11 late presentation. A notable key theme present in other research but not prominent in our results  
12 was that of language barriers being a significant obstacle to accessing healthcare. As our  
13 survey was based on healthcare staff report rather than direct patient experience, staff may be  
14 under-recognising the barrier this creates to patients.  
15  
16

17  
18 In addition to the convergent themes, our results add additional themes not reported in earlier  
19 work. This includes healthcare staff themselves finding the regulations distressing and against  
20 their own values. They also highlight specific safeguarding and ethical issues arising from  
21 restricting healthcare to children. As our data comes from clinicians and is largely drawn from  
22 secondary care experiences, the harms may be more extensive.  
23  
24

25 Our results appear to contradict the December 2018 statement from the UK Department of  
26 Health and Social Care that their internal evidence collection of the impact of NHS charging  
27 regulations, which has been kept confidential, did not find any evidence of harm<sup>21</sup>. The  
28 awareness of this review amongst our respondents was low (29%), suggesting there may have  
29 been a limitation in its reach to front line clinicians.  
30  
31

### 32 33 Conclusion and Recommendations 34

35  
36 Healthcare professionals are increasingly being asked to fulfill roles they are not mandated or  
37 trained for, and to potentially compromise their own values and beliefs. They have told us that  
38 they are seeing harm to the NHS, and to patients - many of whom are particularly vulnerable -  
39 as a result of policies introduced to create a hostile environment for migrants. Our survey results  
40 also highlight a breach of the UK's commitment to the UNCRC, as we have recorded clear  
41 examples of violations to article 24 on children's right to good health and healthcare access.  
42  
43

44 We therefore recommend:  
45

#### 46 **Revoking current NHS charging regulations**

47 We believe there is sufficient evidence of harm for the current NHS charging regulations to be  
48 revoked, thereby restoring the UK's commitment to Universal Health Coverage. The  
49 government should urgently suspend these and commission a transparent independent review  
50 of their impact – using any harms identified as a basis for a policy environment that upholds  
51 migrants' health and human rights.  
52  
53

#### 54 **Adding to the evidence base** 55 56 57 58 59 60

1  
2  
3 Collecting further evidence of the negative impacts of the current NHS charging regulations will  
4 serve to strengthen this call for action. A fully independent review of the charging regulations  
5 should be commissioned, to robustly assess their impact on patients and professionals. We also  
6 encourage the Department of Health to anonymously publish the data from their previous review  
7 of the impact of NHS charging regulations for comparison and validation against our data set.  
8 We recommend other health professionals to carry out similar surveys and case collection  
9 process within their communities of practice, and that other Medical Royal Colleges follow the  
10 example of the RCPCH in supporting them to do so. The RCPCH will continue to host an online  
11 evidence submission for cases where the charging regulations have impacted patient care or  
12 outcomes and encourage health professionals to contribute<sup>22</sup>.  
13  
14  
15

## 16 **References**

- 17  
18  
19 1. [Acute Care & Workforce/Provider Efficiency & Productivity/Cost Recovery](#)  
20  
21 [Programme/13790. Guidance on implementing the overseas visitor charging regulations.](#)  
22  
23 [\(2018\).](#)  
24
- 25 2. [Liberty. \*A Guide to the Hostile Environment\*. \(2018\).](#)  
26
- 27 3. [UN General Assembly. Convention on the Rights of the Child. \(1989\).](#)  
28
- 29 4. [Immigration Act 2014. \(2014\).](#)  
30
- 31 5. [Lock, D. Q. Overseas visitors, asylum seekers and others: Who is entitled to access NHS](#)  
32 [services free of charges and who is required to pay charges for NHS services? \(2017\).](#)  
33  
34
- 35 6. [Acute Care & Workforce/Provider Efficiency & Productivity/Cost Recovery Programme/](#)  
36 [13790. Making a fair contribution: government response to the consultation on the extension](#)  
37 [of charging overseas visitors and migrants using the NHS in England. \(2017\).](#)  
38  
39
- 40 7. [Dexter, Z., Capron, L. & Gregg, L. Making Life Impossible - How the needs of destitute](#)  
41 [migrant children are going unmet. \(2016\).](#)  
42  
43
- 44 8. [Sigona, N. & Hughes, V. No Way Out, No Way In. Irregular Migrant Children and Families in](#)  
45 [the UK. \(2012\).](#)  
46  
47
- 48 9. [Royal colleges support suspension of NHS overseas visitor charges pending review. RCP](#)  
49 [London \(2018\). Available at: \[https://www.rcplondon.ac.uk/news/royal-colleges-support-\]\(https://www.rcplondon.ac.uk/news/royal-colleges-support-suspension-nhs-overseas-visitor-charges-pending-review\)](#)  
50 [suspension-nhs-overseas-visitor-charges-pending-review. \(Accessed: 15th July 2019\)](#)  
51  
52  
53  
54  
55  
56  
57  
58  
59  
60



- 1  
2  
3 10. [Ritchie, J. & Spencer, L. Qualitative data analysis for applied policy research. in \*Analyzing\*](#)  
4 [qualitative data](#) (eds. Bryman, A. & Burgess, R. G.) 173–194 (Taylor & Francis, 1994).  
5 [doi:10.4324/9780203413081\\_chapter\\_9](#)  
6  
7
- 8  
9 11. [Vargas-Silva, C. & Rienzo, C. Migrants in the UK: An Overview. \*Migration Observatory\*](#)  
10 [Available at: \[https://migrationobservatory.ox.ac.uk/resources/briefings/migrants-in-the-uk-\]\(https://migrationobservatory.ox.ac.uk/resources/briefings/migrants-in-the-uk-an-overview/\)](#)  
11 [an-overview/](#). (Accessed: 15th July 2019)
- 12  
13  
14  
15 12. [Thaddeus, S. & Maine, D. Too far to walk: maternal mortality in context. \*Soc. Sci. Med.\*](#)  
16 [1982 38, 1091–1110 \(1994\).](#)
- 17  
18  
19 13. [Calvello, E. J., Skog, A. P., Tenner, A. G. & Wallis, L. A. Applying the lessons of maternal](#)  
20 [mortality reduction to global emergency health. \*Bull. World Health Organ.\* 93, 417–423](#)  
21 [\(2015\).](#)
- 22  
23  
24  
25 14. [Wilmot, E., Yotebieng, M., Norris, A. & Ngabo, F. Missed Opportunities in Neonatal Deaths](#)  
26 [in Rwanda: Applying the Three Delays Model in a Cross-Sectional Analysis of Neonatal](#)  
27 [Death. \*Matern. Child Health J.\* 21, 1121–1129 \(2017\).](#)
- 28  
29  
30  
31  
32 15. [Combs Thorsen, V., Sundby, J. & Malata, A. Piecing together the maternal death puzzle](#)  
33 [through narratives: the three delays model revisited. \*PloS One\* 7, e52090 \(2012\).](#)
- 34  
35  
36 16. [Nellums, D. L. B. et al. \*The lived experiences of access to healthcare for people seeking\*](#)  
37 [and refused asylum. 77 \(Equality and Human Rights Commission, 2018\).](#)
- 38  
39  
40 17. [Nellums, D. L. B. et al. \*Access to healthcare for people seeking and refused asylum in Great\*](#)  
41 [Britain. 77 \(Equality and Human Rights Commission, 2018\).](#)
- 42  
43  
44  
45 18. [General Medical Council. Principles for protecting children and young people, Paragraph 1.](#)  
46 [\(2018\).](#)
- 47  
48  
49 19. [Medecins du Monde. Access to Healthcare in 16 European Countries. \(2017\).](#)
- 50  
51 20. [Meessen, B. et al. Editorial: Iatrogenic poverty. \*Trop. Med. Int. Health\* 8, 581–584 \(2003\).](#)
- 52  
53 21. [Review of amendments made to the NHS Overseas Visitor Charging Regulations in](#)  
54 [2017:Written statement - HCWS1174. UK Parliament Available at:](#)  
55  
56  
57  
58  
59  
60

1  
2  
3 [https://www.parliament.uk/business/publications/written-questions-answers-  
5 statements/written-statement/Commons/2018-12-12/HCWS1174/](https://www.parliament.uk/business/publications/written-questions-answers-<br/>4 statements/written-statement/Commons/2018-12-12/HCWS1174/). (Accessed: 15th July  
6  
7 [2019](#))  
8

- 9 22. Royal College of Paediatrics and Child Health. *Evidence collection portal for NHS charging*  
10 *regulations*. Available at: [www.rcpch.ac.uk/nhs-charging-regulations](http://www.rcpch.ac.uk/nhs-charging-regulations). (Accessed 15<sup>th</sup> July  
11  
12  
13  
14 2019.)  
15  
16  
17  
18  
19  
20  
21  
22  
23  
24  
25  
26  
27  
28  
29  
30  
31  
32  
33  
34  
35  
36  
37  
38  
39  
40  
41  
42  
43  
44  
45  
46  
47  
48  
49  
50  
51  
52  
53  
54  
55  
56  
57  
58  
59  
60

1  
2  
3  
4  
5  
6  
7  
8  
9  
10  
11  
12  
13  
14  
15  
16  
17  
18  
19  
20  
21  
22  
23  
24  
25  
26  
27  
28  
29  
30  
31  
32  
33  
34  
35  
36  
37  
38  
39  
40  
41  
42  
43  
44  
45  
46  
47  
48  
49  
50  
51  
52  
53  
54  
55  
56  
57  
58  
59  
60

**Current role**

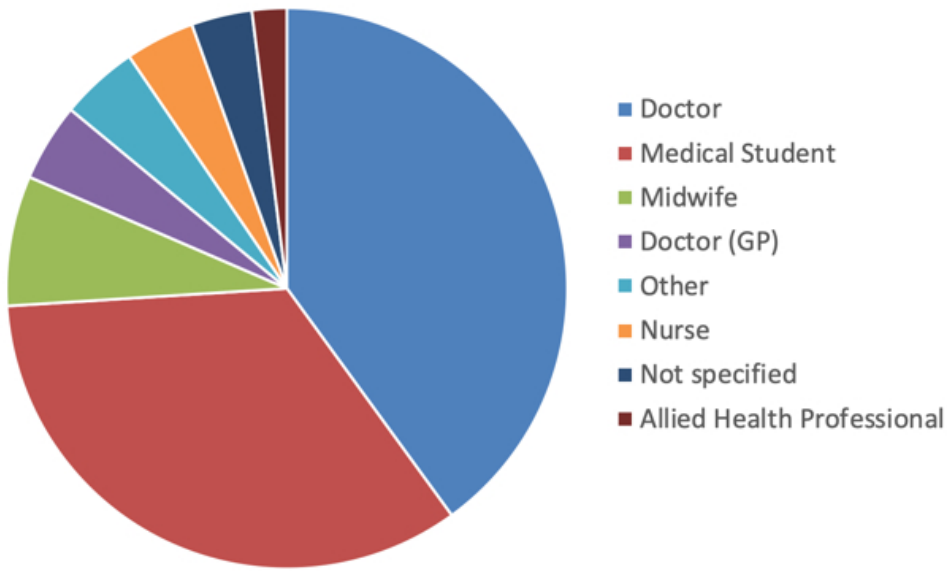

## Healthcare access for children and families on the move and migrants

### Appendix 1:

#### Definitions

|                                    |                                                                                                                                                                                                                                                                                                                                                                                                              |
|------------------------------------|--------------------------------------------------------------------------------------------------------------------------------------------------------------------------------------------------------------------------------------------------------------------------------------------------------------------------------------------------------------------------------------------------------------|
| Undocumented migrant               | Migrants whose immigration status is unresolved making them 'undocumented'. This is a fluid status that can evolve with changes in government immigration policy, and changes in personal circumstances.<br><br>Note: In the case of children, status often depends on immigration status of parents.                                                                                                        |
| NHS Charging regulations           | Refers to the National Health Service (Charges to Overseas Visitors) Regulations 2015, the National Health Services (Charges to Overseas Visitors) (Amendment) Regulations 2015 and the National Health Service (Charges to Overseas Visitors) (Amendment) Regulations 2017<br><br>These are the government regulations on what NHS services are chargeable, who can be charged, and how to implement these. |
| 'Hostile environment' <sup>2</sup> | The UK Home Office hostile environment policy is a set of administrative and legislative measures designed to make staying in the <a href="#">United Kingdom</a> as difficult as possible for people without <a href="#">leave to remain</a> , in the hope that they may " <a href="#">voluntarily leave</a> ".                                                                                              |

1  
2  
3  
4  
5  
6  
7  
8  
9  
10  
11  
12  
13  
14  
15  
16  
17  
18  
19  
20  
21  
22  
23  
24  
25  
26  
27  
28  
29  
30  
31  
32  
33  
34  
35  
36  
37  
38  
39  
40  
41  
42  
43  
44  
45  
46  
47  
48  
49  
50  
51  
52  
53  
54  
55  
56  
57  
58  
59  
60

Healthcare access for children and families on the move and migrants

Confidential: For Review Only

## Appendix 2

### Survey questions:

1. What is your current job title?
2. Where do you work?
3. To what extent do you agree with the following statements (1 being strongly disagree and 5 being strongly agree)?
  - 3.1. I am confident in determining who is chargeable for NHS care
  - 3.2. I am confident I know the exemptions to the charging regulations with regards to certain migrant groups
  - 3.3. I am confident I know the exemptions to the charging regulations with regards to certain medical conditions
  - 3.4. I am confident in understanding which NHS services for children and young people are free at point of delivery
  - 3.5. I am confident in understanding which NHS services for children and young people are chargeable up front
  - 3.6. I am confident in understanding which NHS services for children and young people are chargeable retrospectively
  - 3.7. I am confident my indemnity would provide me with protection if a patient under my care had their healthcare delayed / withheld as a result of the regulations
  - 3.8. I am confident the GMC would provide me with protection if a patient under my care had their healthcare delayed / withheld as a result of the regulations, and their health subsequently deteriorated
  - 3.9. I am confident in defining which aspects of healthcare are 'urgent' or 'immediately necessary' to inform whether treatment will be withheld before payment
  - 3.10. I am confident in how to advocate for a patient who is incorrectly being asked to pay or delay treatment related to immigration status
  - 3.11. I feel that the current NHS charging regulations are fair
  - 3.12. I believe healthcare professionals should play a role in implementing charging regulations in the NHS
4. Do you know any examples of how the NHS charging regulations have positively or negatively impacted patient's health and the care they have received?
  - 4.1. Healthcare seeking: Please describe experiences of cases you are aware of in which the introduction of charging, fear of charges / detention / deportation or reduction of eligibility has impacted on a patient's access to healthcare (e.g. being deterred or delayed from accessing healthcare)
  - 4.2. Healthcare withheld: Please describe any cases you have been involved with in which a patient has had healthcare withheld because of the charging regulations detailed above
  - 4.3. Wider impact: Please describe any other health or socioeconomic impact on patients due to up front charging, fear of charging or immigration status. This may include loss of housing, non attendance at education, ethnic profiling, etc.
5. Do you have any other comments about the impact of the charging regulations and immigration act on health, wellbeing or health-seeking behaviours?
6. Were you aware that there was a Department of Health (DoH) review into the impact of the charging regulations?
7. Do you think that there should be an independent review conducted?
8. Have you had training on this topic before?

1  
2  
3  
4  
5  
6  
7  
8  
9  
10  
11  
12  
13  
14  
15  
16  
17  
18  
19  
20  
21  
22  
23  
24  
25  
26  
27  
28  
29  
30  
31  
32  
33  
34  
35  
36  
37  
38  
39  
40  
41  
42  
43  
44  
45  
46  
47  
48  
49  
50  
51  
52  
53  
54  
55  
56  
57  
58  
59  
60

- 8.1. If yes, what training did you attend?
- 9. Would you be interested in attending training on this topic?

Confidential: For Review Only

## Healthcare access for children and families on the move and migrants

### Appendix 3

Framework developed for analysis:

| + Overarching theme |      |
|---------------------|------|
| Designation         | Code |

#### Culture of fear

|    |                                          |
|----|------------------------------------------|
| A1 | Fear of charging                         |
| A2 | Fear of deportation                      |
| A3 | Fear of criminalisation                  |
| A4 | Fear of data sharing                     |
| A5 | Fear of financial distress / destitution |
| A6 | Fear of impact on immigration status     |
| A7 | Basis of fear not specified              |

#### Delay in care access

|    |                                                    |
|----|----------------------------------------------------|
| C1 | <u>Non attendance</u> at healthcare facilities     |
| C2 | Perpetuation of migrant deterrence from healthcare |
| C3 | Cause of delay not specified                       |

#### Delay in care delivery

|    |                                           |
|----|-------------------------------------------|
| D1 | Due to excess bureaucracy                 |
| D2 | Due to need to source financing           |
| D3 | Due to issues clarifying migration status |
| D4 | Due to issues clarifying eligibility      |
| D5 | Cause of delay not specified              |

#### Impact on health outcomes

|     |                                             |
|-----|---------------------------------------------|
| B1  | Death                                       |
| B2  | Foetal death                                |
| B3  | Health emergency                            |
| B4  | Late diagnoses                              |
| B5  | Preventable complications                   |
| B6  | Inadequate follow up                        |
| B7  | Long term health consequences               |
| B8  | Inability to access preventative healthcare |
| B9  | Reduced quality of care                     |
| B10 | Impact on population health                 |
| B11 | Delayed antenatal care                      |
| B12 | <u>Non compliance</u> with care             |
| B13 | Impact on health outcomes not specified     |

#### Denial of healthcare

|    |                                    |
|----|------------------------------------|
| E1 | Lack of upfront payment            |
| E2 | Inappropriate denial when entitled |
| E3 | Unseen consequences                |
| E4 | Cause of denial not specified      |



**Issues determining eligibility**

|    |                                                           |
|----|-----------------------------------------------------------|
| F1 | Inadequate record keeping                                 |
| F2 | Staff unaware of exemptions                               |
| F3 | Non clinical staff determining entitlements               |
| F4 | Issue determining eligibility was difficult not specified |

**Lack of knowledge of charging regulations**

|    |                                                            |
|----|------------------------------------------------------------|
| H1 | Rumours and misinformation in migrant communities          |
| H2 | Non clinical staff gatekeeping access to care              |
| H3 | Ambiguity of charging regulations                          |
| H4 | Inappropriate charging                                     |
| H5 | Overseas visitors teams acting independently of clinicians |
| H6 | Poor communication around patient's entitlements           |

**Wider context of the hostile environment**

|    |                                    |
|----|------------------------------------|
| I1 | Distress for patient and families  |
| I2 | Withdrawal from education          |
| I3 | Abandonment of children            |
| I4 | Malnourishment                     |
| I5 | Impact on housing                  |
| I6 | Unsafe repatriation                |
| I7 | Charging perpetuating destitution  |
| I8 | Lack of access to support services |
| I9 | Economic fallout of ill health     |

**Difficulty assessing eligibility**

|     |                                                            |
|-----|------------------------------------------------------------|
| G1  | Building rapport to determine eligibility                  |
| G2  | Assessing cases of trafficking or slavery                  |
| G3  | Assessing cases of sexual and domestic violence            |
| G4  | Staff not trained to assess eligibility                    |
| G5  | Lack of patient capacity                                   |
| G6  | Evolving eligibility                                       |
| G7  | Complex legal status                                       |
| G8  | Ineligible residency                                       |
| G9  | Complexity of the health system                            |
| G10 | Reason determining eligibility was difficult not specified |

|     |                                                              |
|-----|--------------------------------------------------------------|
| I10 | Lack of appreciation of health needs by immigration services |
| I11 | Changing status to access healthcare                         |
| I12 | NHS debts affecting regularisation of status                 |
| I13 | Deviation from normal practice                               |
| I14 | Stigma                                                       |

**Wider impacts on clinical staff**

|    |                                                                                         |
|----|-----------------------------------------------------------------------------------------|
| J1 | Distress to NHS staff due to denying/delaying care                                      |
| J2 | NHS staff or their families unable to afford health surcharge/ access care              |
| J3 | Against the duties of healthcare staff as determined by their professional institutions |
| J4 | Antagonistic to personal views and values                                               |
| J5 | Personal fears or fears for families                                                    |
| J6 | Reputation                                                                              |
| J7 | No experience of patient charging                                                       |
| J8 | Acceptance of charging regulations                                                      |

**Wider impacts on the NHS**

|    |                                                             |
|----|-------------------------------------------------------------|
| K1 | Increased burden on A&E                                     |
| K2 | Increased burden on GP                                      |
| K3 | Increased healthcare resource use                           |
| K4 | Hypocrisy                                                   |
| K5 | Human rights breaches                                       |
| K6 | Futile charging                                             |
| K7 | Discharge difficulties / delays                             |
| K8 | Discord between health institutions                         |
| K9 | Increased financial costs of delayed care access / delivery |

**Clinicians as advocates**

|    |                                           |
|----|-------------------------------------------|
| L1 | Navigation of the health system           |
| L2 | Appealing / overriding charging decisions |

**Patient ethnicity**

|    |                  |
|----|------------------|
| M1 | Racism           |
| M2 | Racial profiling |

**Clinical conditions**

|    |                          |
|----|--------------------------|
| N1 | Cancer                   |
| N2 | Complex clinical cases   |
| N3 | Life threatening illness |
| N4 | Pregnancy                |
| N5 | Surgery                  |
| N6 | Chronic disease          |

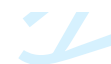

## Healthcare access for children and families on the move and migrants

### Appendix 4

| Theme                                                          | Definition                                                                                                                                                                                                                  |
|----------------------------------------------------------------|-----------------------------------------------------------------------------------------------------------------------------------------------------------------------------------------------------------------------------|
| 1. Fear of consequences of engagement in healthcare.           | Current NHS charging regulations contribute to a culture of fear within the healthcare environment, that makes patients unwilling or unable to engage in healthcare services.                                               |
| 2. Deterrence from healthcare                                  | Current NHS charging regulations deter migrants, and not just those who have irregular immigration status, from accessing healthcare.                                                                                       |
| 3. Delay in or denial of healthcare provision                  | Current NHS charging regulations have resulted in the delay or denial of healthcare deemed necessary by clinical staff, affecting patients of all eligibilities.                                                            |
| 4. Impact of charging regulations on patient health outcomes   | The current NHS charging regulations are having a detrimental impact on patient's health, due to deterrence from care, impact on the delivery of timely or quality care or by influencing the wider determinants of health. |
| 5. Current charging regulations unworkable                     | The current NHS charging regulations are unworkable in their current form, as both clinical and non-clinical staff are struggling to interpret and implement them in a standardised manner.                                 |
| 6. Impact of charging regulations on NHS                       | Current charging regulations are having negative impact on the National Health Service, bringing a financial and resource burden, and on its staff, causing emotional distress to those involved in patient care.           |
| 7. Context of the wider hostile environment influencing health | The current NHS charging regulations are just one policy used to create a 'hostile environment' for migrants, many of which can have an impact on health and wellbeing.                                                     |

# BMJ Paediatrics Open

## Healthcare access for children and families on the move and migrants

|                               |                                                                                                                                                                                                                                                                                                                                                                                                                                                                |
|-------------------------------|----------------------------------------------------------------------------------------------------------------------------------------------------------------------------------------------------------------------------------------------------------------------------------------------------------------------------------------------------------------------------------------------------------------------------------------------------------------|
| Journal:                      | <i>BMJ Paediatrics Open</i>                                                                                                                                                                                                                                                                                                                                                                                                                                    |
| Manuscript ID                 | bmjpo-2019-000588.R1                                                                                                                                                                                                                                                                                                                                                                                                                                           |
| Article Type:                 | Original research                                                                                                                                                                                                                                                                                                                                                                                                                                              |
| Date Submitted by the Author: | 26-Feb-2020                                                                                                                                                                                                                                                                                                                                                                                                                                                    |
| Complete List of Authors:     | Murphy, Lisa; Medact<br>Broad, Jonathan; Medact<br>Hopkinshaw, Bryony; Medact<br>Boutros, Sarah; University College London Institute of Child Health<br>Russell, Neal; University of London St George's Molecular and Clinical Sciences Research Institute<br>Firth, Alison; Royal College of Paediatrics and Child Health<br>McKeown, Rachael; Royal College of Paediatrics and Child Health<br>Steele, Alison; Royal College of Paediatrics and Child Health |
| Keywords:                     | Paediatric Practice, Ethics, Children's Rights, Health Service                                                                                                                                                                                                                                                                                                                                                                                                 |
|                               |                                                                                                                                                                                                                                                                                                                                                                                                                                                                |

SCHOLARONE™  
Manuscripts



I, the Submitting Author has the right to grant and does grant on behalf of all authors of the Work (as defined in the below author licence), an exclusive licence and/or a non-exclusive licence for contributions from authors who are: i) UK Crown employees; ii) where BMJ has agreed a CC-BY licence shall apply, and/or iii) in accordance with the terms applicable for US Federal Government officers or employees acting as part of their official duties; on a worldwide, perpetual, irrevocable, royalty-free basis to BMJ Publishing Group Ltd ("BMJ") its licensees and where the relevant Journal is co-owned by BMJ to the co-owners of the Journal, to publish the Work in this journal and any other BMJ products and to exploit all rights, as set out in our [licence](#).

The Submitting Author accepts and understands that any supply made under these terms is made by BMJ to the Submitting Author unless you are acting as an employee on behalf of your employer or a postgraduate student of an affiliated institution which is paying any applicable article publishing charge ("APC") for Open Access articles. Where the Submitting Author wishes to make the Work available on an Open Access basis (and intends to pay the relevant APC), the terms of reuse of such Open Access shall be governed by a Creative Commons licence – details of these licences and which [Creative Commons](#) licence will apply to this Work are set out in our licence referred to above.

Other than as permitted in any relevant BMJ Author's Self Archiving Policies, I confirm this Work has not been accepted for publication elsewhere, is not being considered for publication elsewhere and does not duplicate material already published. I confirm all authors consent to publication of this Work and authorise the granting of this licence.

# Healthcare access for children and families on the move and migrants

Corresponding author:

Dr.Lisa Murphy

Email: lisaanna.murphy@gmail.com

Phone: +447935994073

Postal address: 1/2 48 Dinmont Road, Glasgow, G41 3UL

This research has been carried out, analysed and authored by five child health professionals and two members of staff of the Royal College of Paediatrics and Child Health:

Dr. Lisa Murphy (corresponding author), Fellow in Public Health, Medact, UK

Dr. Jonathan Broad, Paediatric SHO, Medact, UK

Dr. Bryony Hopkinshaw, Paediatric Registrar, Medact,UK

Dr. Sarah Boutros, Paediatric Registrar, University College London Institute of Child Health, UK

Dr. Neal Russell, Paediatric Registrar, St.George's University Hospital, UK

Ms. Alison Firth, Royal College of Paediatrics and Child Health, UK

Ms. Rachael McKeown, Royal College of Paediatrics and Child Health, UK

Dr. Alison Steele, Royal College of Paediatrics and Child Health, UK

**COI:** None of the authors have any conflicts of interest to report. This research received no funding or other material support from any external source. All authors meet the ICMJE requirements for authorship.

**Contributor statement:** All authors meet the ICMJE requirements for authorship. LM, JB, BH, SB and NR developed the initial survey, which was reviewed by AF, AS and RM. AF and RM managed dissemination via RCPCH online channels. LM and JB did the initial analysis and developed the framework for analysis. LM, BH and RM coded the data

1  
2  
3 gathered against the framework. LM and SB performed the further analysis and write up for  
4 the qualitative results section. JB and NR performed statistical analysis and made the  
5 included figures and tables. SB led on writing the introduction, BH led on writing the  
6 discussion, while LM and AS performed full paper editing. AF performed further review with  
7 support from RM prior to finalising the paper for submission. LM arranged the materials for  
8 submission and liaised with BMJ Paeds open editorial staff. LM is responsible for the overall  
9 content as guarantor.  
10  
11  
12  
13  
14

15 **Key words:** child health services, clinical ethics, public health, health systems, human  
16 rights, inequalities  
17  
18  
19

20 **Word count:** 4990 **Reference count:** 24  
21  
22  
23  
24  
25  
26  
27  
28  
29  
30  
31  
32  
33  
34  
35  
36  
37  
38  
39  
40  
41  
42  
43  
44  
45  
46  
47  
48  
49  
50  
51  
52  
53  
54  
55  
56  
57  
58  
59  
60

## Abstract

**Background:** The United Kingdom (UK) National Health Service (NHS) charging regulations have increasingly restricted migrants' healthcare access, in the context of a wider national policy shift over the past few years intending to create a 'hostile environment' for migrants. With an estimated 144,000 undocumented children living in the UK and increasing public concern that these regulations are negatively impacting migrant health and wellbeing, as well as contravening international child rights agreements, it has become imperative to understand their implications.

**Methodology:** A mixed methods digital survey, covering attitudes towards and understanding of UK healthcare charging, and giving space for relevant case submission, was disseminated through communications channels of the Royal College of Paediatrics and Child Health (RCPCH) to their members. Quantitative data were analysed on Stata, and basic proportions were calculated for each response proportion. Qualitative data were analysed using a framework analysis approach.

**Results:** There were 200 responses, from a range of healthcare professional backgrounds. The majority were not confident in interpreting and applying the charging regulations. 34% reported examples of the charging regulations impacting patient care, analysis of which elicited 7 key themes. Our survey gathered 18 cases of migrants being deterred from accessing healthcare, 11 cases of healthcare being delayed or denied outright and 12 cases of delay in accessing care leading to worse health outcomes, including 2 intrauterine deaths.

**Discussion:** Our results describe a range of harms arising from the current NHS charging regulations contributing to delays in or denials of healthcare, due to patients' fear of charging or immigration enforcement, including potential deportation, and confusion around entitlements. This harm affects individual patients, the migrant community and the NHS – often in multiple simultaneous ways. Many patients eligible for NHS care, such as trafficking victims, are not being identified as such. We found the current charging regulations to be unworkable and that harm could not be eliminated simply through improved awareness or implementation.

## What is already known

- Excluding certain migrant groups from healthcare access often results in greater health system costs, as demonstrated in several EU studies.
- The NHS charging regulations are a deterrence to healthcare access for certain migrant groups and are a source of harm to individual patients and to public health, as reported by Maternity Action, Doctors of the World, and the British Medical Association. Most of the evidence relates to pregnant women and other adult migrant populations, and is often focused around a number of high profile cases.
- NHS charging regulations are putting a strain on healthcare professionals at a time of already stretched services.

## What this study adds



- The NHS charging regulations are having direct and indirect impacts on migrant children and pregnant women, with evidence of a broad range of harms.
- There is a lack of understanding of current NHS charging regulations and their intended application amongst healthcare staff.
- The NHS charging regulations are unworkable and are having a detrimental impact on the wider health system, as well as conflicting with its staff's professional and ethical responsibilities.

Confidential: For Review Only

## Background

Recent NHS charging regulations have increasingly restricted access to the United Kingdom (UK) National Health Service (NHS) for migrants, particularly in England<sup>1</sup>. They have been introduced as one part of a suite of national policies intended to create a 'hostile environment' for undocumented migrants in the UK by embedding immigration control within and restricting access to public services<sup>2</sup>. Reasons why a migrant child might be undocumented include being born to undocumented parents, being an unrecognised survivor of trafficking, or due to financial barriers to regularise their status. In this context, and in light of the UK's commitment to uphold the 'highest attainable standard of health' for all children under the UN Convention on the Rights of the Child (UNCRC)<sup>3</sup>, it has become imperative to understand the impact of the NHS charging regulations (see appendix 1) on migrant children and their families.

The 2014 Immigration Act<sup>4</sup>, changed the definition of 'ordinarily resident' (the condition upon which eligibility for free NHS care depends) and thereby further restricted access to the NHS for people with irregular immigration status<sup>5</sup>. Since then, the charging regulations of 2015 and 2017<sup>1</sup> include: i) charging for most secondary and community care; ii) charging at 150% of the NHS tariff for chargeable patients iii) upfront charging before treatment is provided (unless urgent or immediately necessary); and iv) debts of >£500 being reported to the Home Office, which could result in migrants facing immigration enforcement measures such as detention, deportation or the jeopardising of immigration applications. NHS trusts are delegated the responsibility to identify those deemed ineligible for free care and bill them accordingly, through 'Overseas Visitor Managers' or similar offices. Clinical staff are required by the 2017 charging regulations to determine whether a patient's care should be charged prior to treatment, or is deemed 'urgent or immediately necessary' and thus can be billed retrospectively.

Certain patient groups, such as asylum seekers, refugees, victims of trafficking recognised by the National Referral Mechanism (NRM), and children looked after by the local authority, are exempt from charging. Additionally, some infectious diseases, notifiable infections, and conditions which arise as a result of violence (domestic, sexual, torture, FGM) are also exempt<sup>1</sup>. Care given in Emergency Departments and in Primary Care currently remains free of charge for all. Extension of charging into these services has been proposed, however<sup>6</sup>, and significant barriers have been noted for migrant families to access primary care beyond financial considerations. For example, much of the paperwork often mandated prior to registration by General Practices, such as photographic identification or proof of address, is incompatible with NHS guidance - and disproportionately impacts vulnerable groups such as migrants<sup>7</sup>.

1  
2  
3  
4  
5 Undocumented migrants in the UK, estimated to be around 618,000 (including 144,000  
6 children)<sup>8</sup>, are also facing increasing immigration application fees and cuts to legal aid<sup>9</sup>. The  
7 majority of these individuals cannot access employment, rent, or any mainstream welfare  
8 benefits<sup>8</sup>. It is therefore increasingly difficult to regularise their immigration status thus  
9 driving families and children further into destitution<sup>8</sup>. Being in such precarious situations puts  
10 migrants at further risk of exploitation, domestic violence, and modern slavery. This is  
11 especially concerning for children, as their immigration status generally depends on their  
12 parents'. It is currently unclear whether the UK's exit from the European Union will lead to  
13 the loss of formal immigration status for a further cohort of children, and if so, how many  
14 children this would affect.  
15  
16  
17  
18  
19  
20  
21  
22

23 Several medical colleges, including the Royal College of Paediatrics and Child Health  
24 (RCPCH) have publicly stated their concern about the impact of these regulations on migrant  
25 health and wellbeing<sup>10</sup>. As a team of child health professionals, we therefore wished to  
26 investigate this impact in relation to the population we care for. We collaboratively conducted  
27 a survey of frontline professionals, with the RCPCH policy team, on their views and  
28 experiences of NHS charging for children and pregnant women. The survey aimed to  
29 understand healthcare professionals' knowledge of and attitudes to NHS charging  
30 regulations and to understand the impacts of the charging regulations and wider migration  
31 policy changes in practice. Whilst the charging regulations primarily target short-term visitors  
32 to the UK and undocumented migrants, we wanted to also explore whether there are  
33 impacts on wider migrant populations, and the paper covers experiences of professionals  
34 working with refugees and asylum seekers, as well as undocumented migrants. \_  
35  
36  
37  
38

### 39 Methodology

#### 40 **Ethical approval**

41 Consultation of the Health Research Authority and Medical Research Council ethical  
42 approval decision tool found that NHS Research Ethics Service approval was not required  
43 for this research in any of the four nations of the United Kingdom.  
44  
45  
46  
47  
48  
49  
50

#### 51 **Survey Design**

52 A mixed methods digital survey was developed by five clinicians and further refined following  
53 review by experienced RCPCH researchers. The survey (published in full in appendix 2) was  
54 designed for adaptability and comparison with other medical specialties and patient  
55 populations. The survey included 12 Likert scale questions and five binary yes/no questions  
56 intended to measure practitioners' attitudes towards, and understanding of, policies  
57 restricting healthcare access eligibility in migrant groups. It also included three qualitative  
58 free text questions, investigating themes of deterrence and delay of healthcare, as well as  
59  
60

1  
2  
3 the wider impacts of hostile policies on migrant children and pregnant women.  
4  
5  
6

## 7 **Recruitment & participants**

8  
9  
10 The survey was open to participation to all children's health practitioners working in the UK,  
11 including paediatricians, healthcare students, midwives, nurses, other doctors, and child  
12 health specialists. A variety of recruitment methods were utilised. RCPCH members were  
13 emailed via four email bulletins: to those members on specific mailing lists for research and  
14 clinical leads, then once to the entire membership who consented to emails (14,598 emails  
15 sent in total). Recruitment messages were all within a wider email bulletin including  
16 unrelated content. It was also shared five times on a social media platform (Twitter), on  
17 which 17,000 people were followers at the time. The proportion of email recipients who are  
18 on multiple email lists, or who also engage with the college's Twitter channel is unknown. A  
19 targeted recruitment method was also adopted in two London teaching hospitals with large  
20 paediatrics departments. In these hospitals, members of paediatrics departments also  
21 received an additional email and two researchers orally announced the surveys in  
22 departmental meetings (to approximately 500 staff and students).  
23  
24  
25  
26  
27  
28

## 29 **Data collection**

30  
31 The survey collection period was two months (January - February 2019) in which  
32 participants could submit their responses. Participants could submit their responses  
33 anonymously either via an online tool (Survey Monkey) using computers or other handheld  
34 devices, or in paper format into sealed boxes left in hospital departments.  
35  
36  
37  
38

## 39 **Data analysis**

40  
41 Quantitative data were analysed on Stata, and basic proportions were calculated for each  
42 response proportion. Non-responders were not included in the denominator, therefore the  
43 proportion presented is in relation to the number of responses per question, not overall  
44 participants. Qualitative data were analysed using a framework analysis approach<sup>11</sup>. JB and  
45 LM reviewed the data separately, devised a coding framework independently, then formed a  
46 framework by consensus, with overall themes and sub-codes that had an agreed definition.  
47 This framework was then applied independently by LM and two researchers who had not  
48 developed the framework (RM and BH). The framework that was developed can be found in  
49 appendix 3.  
50  
51  
52  
53  
54  
55

## 56 **Patient or public involvement**

57  
58 No patients or public were involved in the design or conduct of this research. This was not  
59 thought pertinent for our research at this time, as we were seeking to understand healthcare  
60

professionals' experiences. Additionally, as those affected by the charging regulations are often in precarious situations in the UK they can be difficult to engage and are often understandably reluctant to participate in research or publicly describe their stories.

## Results

### Quantitative Results

In total there were 220 responses to the consultation, however 20 respondents only inputted their profession and location without responding to any other question on the survey. They were thus excluded from subsequent analysis. This is a similar response rate to that of other surveys disseminated by the RCPCH. A range of professionals were included in the survey including midwives, nurses, allied health professionals, medical students and charity workers, with doctors being the most numerous (44.5%), comprising paediatric consultants, trainees, general practitioners, and trust grade doctors. All four nations were represented, although 69.5% respondents were from Greater London. This may be explained by the fact that London has the largest number of migrants compared with other UK regions<sup>12</sup>. As all the questions included in our survey were not compulsory there was variance in the number of questions answered by our respondents. For our results we have therefore included the number of those who answered the question alongside each, denoted by 'n'.

#### Figure 1: Survey respondents' demographics, showing their professional role and location within the United Kingdom (n=200)

The majority of professionals (53%) strongly disagreed or disagreed that they were confident in the definition of urgent and immediately necessary care. In all questions, the majority of professionals strongly disagreed or disagreed that they were confident in determining which circumstances, conditions and groups patients would be charged in, either upfront or in retrospect. Those who reported feeling confident in their understanding of the regulations came from a range of healthcare backgrounds and were spread across the country, with no clear commonality between them. Respondent answers to these Likert scale questions are detailed in table 1.

#### Table 1: Knowledge of/confidence in the charging regulations amongst respondents

-

| <b>"I am confident in determining/my knowledge of"....</b> |                          |                 |                |              |                       |              |
|------------------------------------------------------------|--------------------------|-----------------|----------------|--------------|-----------------------|--------------|
|                                                            | <b>Strongly disagree</b> | <b>Disagree</b> | <b>Neutral</b> | <b>Agree</b> | <b>Strongly agree</b> | <b>Total</b> |
| How to define urgent/immediately necessary                 | 56 (29%)                 | 45 (24%)        | 42 (22%)       | 37 (19%)     | 10 (5%)               | 190          |
| How to advocate for patients                               | 47 (36%)                 | 32 (25%)        | 25 (19%)       | 16 (12%)     | 9 (7%)                | 129          |
| When to charge retrospectively                             | 64 (51%)                 | 34 (27%)        | 15 (12%)       | 6 (5%)       | 6 (5%)                | 125          |
| When to charge upfront                                     | 63 (50%)                 | 33 (26%)        | 13 (10%)       | 10 (8%)      | 6 (5%)                | 125          |
| Which services exempt                                      | 73 (38%)                 | 50 (26%)        | 32 (17%)       | 23 (12%)     | 12 (6%)               | 190          |
| Which conditions exempt                                    | 94 (50%)                 | 48 (26%)        | 19 (10%)       | 21 (11%)     | 5 (3%)                | 187          |
| Which patients exempt                                      | 67 (52%)                 | 33 (26%)        | 10 (8%)        | 12 (9%)      | 6 (5%)                | 128          |
| Which patients chargeable                                  | 61 (32%)                 | 58 (31%)        | 43 (23%)       | 19 (10%)     | 9 (5%)                | 190          |

Most respondents (60%) felt that the policies of charging migrants for NHS care was unfair, and the majority felt that healthcare professionals should not play a role in implementing charging (58%). The majority of respondents were not confident that they would be covered by their indemnity providers (81% not confident) or the GMC (87% not confident) in case of harm coming to a patient as a result of their interpretation or implementation of the charging regulations (see table 2).

**Table 2: Opinions of indemnity and GMC coverage in relation to patient harm resulting from charging regulations amongst respondents**

| <b>“I am confident that [xxx] would provide me with protection if a patient under my care had their healthcare delayed/ withheld as a result of the regulations”</b> |                          |                 |                |              |                       |              |
|----------------------------------------------------------------------------------------------------------------------------------------------------------------------|--------------------------|-----------------|----------------|--------------|-----------------------|--------------|
|                                                                                                                                                                      | <b>Strongly Disagree</b> | <b>Disagree</b> | <b>Neutral</b> | <b>Agree</b> | <b>Strongly Agree</b> | <b>Total</b> |
| Indemnity coverage                                                                                                                                                   | 79 (62%)                 | 24 (19%)        | 16 (13%)       | 6 (5%)       | 3 (2%)                | 128          |
| Protection by GMC                                                                                                                                                    | 89 (70%)                 | 22 (17%)        | 7 (5%)         | 7 (5%)       | 3 (2%)                | 128          |

There was a lack of awareness of the Department of Health and Social Care’s 2017 review into the impact of the charging regulations among respondents, with 71% of respondents not aware it had been carried out. However, 76% reported they felt that there was a need for an independent review of these regulations.

12.4% of those who responded to the question of whether they had received training on this topic (n=178) said they had, although we did not assess the details this contained. Of those who responded to the question of whether they would like to receive further training (n=112), 72.3% responded positively.

## Qualitative Results

34% of respondents reported that they knew of examples of how NHS charging regulations had impacted patient health and care. They were subsequently asked to describe these known cases under three themes: 'healthcare seeking', 'healthcare withheld' and 'wider impact of charging'. Review of the responses using our analysis framework elicited seven key themes (detailed definitions of which are in appendix 4). Free text answers were then grouped within these, with several responses cross cutting several themes.

### Theme 1 - Patient fear of consequences of engagement in healthcare.

At least 19 cases detailed of patients and families afraid to come into contact with health services, avoiding attendance or disengaging from care. A recurring narrative was that of fear of receiving unaffordable bills for healthcare. At least six women were reported as having presented late in pregnancy or in labour due to fear of charging. Seven of our respondents detailed a fear of deportation as a consequence of accessing healthcare. Healthcare facilities were seen as being complicit in information sharing with other government agencies, and as such patients were deterred from care due to fear of data sharing, and potential deportation and criminalisation. One respondent detailed that *"Patients at my hospital frequently do not attend with their children as they have overstayed their visa and fear deportation if they come to our attention."*

### Theme 2 - Deterrence from accessing healthcare.

Our survey found 18 cases of migrants being deterred from accessing healthcare, including preventative measures such as screening. Respondents raised concern that the charging regulations were leading to racial profiling, having witnessed non caucasian patients being asked to 'prove' their eligibility at a higher rate. Respondents expressed concern that healthcare seeking in this group is already low, and that the charging regulations could be exacerbating this. One answer described experiencing *"Patients presenting to accident and emergency, late, where migration status was one factor contributing. Profiling leading to all sorts of people being deterred e.g. both migrants and people with learning disabilities who now feel they need a passport to access care"*, with several responses detailing *"pregnant women avoiding antenatal care for fear of the huge bill and their details being shared with Home Office"*. Respondents also highlighted that individual cases could resonate throughout migrant communities, with one case of charging or hostility causing widespread fear of accessing healthcare.

### Theme 3 - Delay in or denial of healthcare provision.

Our survey gathered 11 cases of pregnant women and children having healthcare delayed or denied outright due to the current charging regulations. One case reported in our survey



1  
2  
3 was of a "2 year old boy in UK on government resettlement scheme (with full refugee status)  
4 turned away from outpatient hospital appointment for review". In some cases, this was  
5 because care was not deemed 'urgent or immediately necessary', or there was  
6 disagreement between healthcare professionals on the level of care which should be  
7 provided. In others, a lack of knowledge of exemptions to charging meant that patients had  
8 their care delayed or denied. The potential impact of this was outlined by one respondent:  
9 "*Treatments that were not immediately life-saving but that were potentially life-prolonging*  
10 *and disability-sustaining withheld for days-weeks whilst entitlement to NHS care clarified*".  
11 The issue of when eligibility was assessed came up in several responses, with non-clinical  
12 staff acting as 'gatekeepers' to care. Cases reported in our survey covered a wide range of  
13 clinical scenarios, including children with cancer, congenital conditions and those requiring  
14 surgery. In one reported example, a "*child presented with leukaemia required intensive care*  
15 *treatment and to start chemotherapy. Had eu passport but resident in Africa. Hospital*  
16 *unwilling to start chemotherapy until deposit funds provided therefore treatment delayed*".  
17  
18  
19  
20  
21  
22

#### 23 **Theme 4** - Impact of charging regulations on patient health outcomes.

24  
25 Our respondents detailed at least 12 cases of delay in accessing or receiving healthcare  
26 leading to potentially avoidable health complications or poor outcomes. This includes two  
27 cases of intrauterine death in pregnant women who had been deterred from accessing  
28 antenatal care. Four respondents told of children presenting in critical condition due to a  
29 delay in attendance, with one saying "*I've seen children being brought to ED very sick / not*  
30 *having consulted the gp before because of concerns about this. Also we often see young*  
31 *children which have other health or dental problems discovered incidentally as they have not*  
32 *sought care because of this". In many cases, the patient's length of stay was extended due*  
33 *to late presentation leading to increased care requirements. One case described a child*  
34 *"born with a severe and life limiting condition which could have been detected antenatally if*  
35 *she had received antenatal care at the right time in pregnancy", another described the case*  
36 *of an unwell child where the "case needed to be reviewed by specialist centre to determine*  
37 *treatment options, but they refused to see her as 'not eligible for nhs care'...Case was clearly*  
38 *immediately necessary and she should have been seen regardless. My colleague was able*  
39 *to go back to specialist hospital to advocate for patient and they eventually saw her after an*  
40 *unnecessary delay to her care". There was also disengagement from, or non-compliance*  
41 *with, prescribed care reported, due to fear of charging or immigration enforcement.*  
42  
43  
44  
45  
46  
47  
48  
49

#### 50 **Theme 5** - Current charging regulations unworkable.

51 Many respondents described cases in which the current regulations were implemented  
52 incorrectly or in a manner which was felt to be harmful to patients and their families. A broad  
53 range of different issues relating to implementation were described, including issues  
54 determining eligibility, failure to identify exemptions, and lack of coordination between clinical  
55 and non-clinical staff.  
56  
57

58 There were numerous cases of eligible patients being inappropriately billed or threatened  
59 with billing, with one respondent saying "*We know that twice as many people that were*  
60

1  
2  
3 *technically under these regulations got sent bills than were actually required to pay them*". It  
4 was highlighted that not only is knowledge of exemptions to charging low, they can be hard  
5 to identify. One case told of a women who *"had been trafficked into the UK, and her 'partner'*  
6 *had all her documents which she could not access, suggesting she may have been in*  
7 *modern day slavery. She was also being domestically abused. All these criteria could have*  
8 *identified her as exempt from charging, but they were not identified until after the baby was*  
9 *born."* Respondents reported frustration that administrative staff would act independently of  
10 clinicians, for example visiting patients on wards to assess eligibility or collect payment for  
11 care. In two cases they brought bills to families on clinical wards, causing confusion and  
12 distress about whether a child was able to continue receiving care.  
13  
14  
15  
16  
17

### 18 **Theme 6** - Impact of charging regulations on the NHS. 19

20  
21 Many respondents felt that the charging regulations were having an undue burden on our  
22 health system, and in particular on the staff working within it. Respondents stated that not  
23 only did it go against their professional duties as stated by their regulatory bodies, but  
24 against their own values and the principles of the NHS. This sentiment was encapsulated by  
25 one respondent who said *"I feel exorbitant charging for immigrant children and the undue*  
26 *delay getting things done (procuring equipment, getting consultations) for such children*  
27 *would create a bad reputation. As a doctor I feel stressed and immoral handling this"*.  
28 Clinicians told of going beyond their usual duties to help patients navigate the healthcare  
29 system and advocate on their behalf against inappropriate charging. They also detailed  
30 cases where the charging regulations led to an increased burden on NHS finances and  
31 resources, noting that it was *"costly to the NHS as people often need emergency treatment*  
32 *and hospital treatment for a condition that was treatable earlier on"*.  
33  
34  
35  
36  
37  
38

### 39 **Theme 7** - Context of the wider 'hostile environment' influencing health. 40

41 Respondents to our survey gave several examples of the 'hostile environment' impacting on  
42 families, including exacerbating socioeconomic inequalities and preventing access to range  
43 of services. This ranged from affecting their access to education, to resulting in insecure  
44 access to food and shelter. In one reported instance, a *"Child with life limiting diagnosis...  
45 parents left them because they knew that unaccompanied children would get healthcare"*.  
46 Respondents also highlighted a lack of appreciation of health needs by immigration services,  
47 detailing that children could be placed in unsuitable accommodation or far away from the  
48 clinical team caring for them.  
49  
50  
51  
52  
53  
54  
55  
56  
57

## 58 Discussion 59

60 The results of this survey describe a range of harms, arising from various aspects of current

1  
2  
3 NHS charging regulations contributing to delays in or denials of healthcare. The 'Three  
4 Delays' model proposes that delays in timely care can be explained by 1) delays in decision  
5 to seek care, 2) delays in accessing a health facility, 3) delays in receiving appropriate care  
6 at the facility<sup>13</sup>. This model was originally proposed to explain contributors to maternal  
7 mortality in low and middle income countries, but has been adapted to describe delays in  
8 other types of care<sup>14,15</sup>. Our survey results demonstrate the model's applicability to  
9 children and pregnant women being impacted by the 'hostile environment' in the UK. Fear -  
10 particularly of charging and of deportation - and confusion around entitlements, are leading  
11 to delays in seeking care (themes 1 and 2). Delays in reaching a health facility may be  
12 occurring due to destitution and unsuitable housing locations (theme 7). Once patients reach  
13 hospital, delays are occurring due to confusion around eligibility or immigration status, or due  
14 to denial of care until payment is received (themes 3 and 5). As described in other settings,  
15 the three delays can each cause harm in isolation, but even more so when occurring in  
16 combination<sup>16</sup>. That the 'hostile environment' can impact patients in multiple simultaneous  
17 ways could explain the extent of the harm described even within this relatively small survey.  
18 This is particularly concerning given the long term health consequences of such adverse  
19 experiences and exposure to high stress in childhood<sup>17</sup>. Importantly, our survey only  
20 reflects cases where there was an eventual, although often delayed, attendance at a  
21 healthcare facility and does not capture harmful outcomes of migrants never accessing  
22 health services at all.

23  
24  
25 In addition to demonstrating harm, our survey results suggest that the NHS Charging  
26 Regulations are poorly understood and poorly implemented. Our quantitative data  
27 demonstrated that clinicians' knowledge is low regarding exemptions that are meant to  
28 protect the most vulnerable. Qualitative responses suggest that many patients who would in  
29 reality be eligible for free care are not being identified as such, and are still having their  
30 access delayed or denied. Our survey highlighted several cases of trafficked victims being  
31 deterred and/or denied care, demonstrating how difficult it is in practice to implement the  
32 exemptions to charging, which exist to provide care for the most vulnerable and protect  
33 population health. Indeed, to identify those vulnerabilities, a good rapport needs to be built  
34 between patient and clinician. This is made almost impossible in the context of fear that  
35 surrounds these regulations.

36  
37  
38 Despite overall understanding of charging regulations being low, several respondents  
39 highlighted their personal experience of acting as advocates for patients, for example in  
40 identifying exemptions, or by arguing that care is "urgent or immediately necessary" (which  
41 allows billing to be retrospective). Yet 80% of our respondents told us they felt  
42 disempowered to advocate for their patients on charging issues due to lack of confidence,  
43 meaning this can not be consistently relied upon as a means to mitigate the harmful impacts  
44 of charging. This reliance on clinical resource for non-clinical activity may impact other areas  
45 of service delivery or put increased demands on an already overstretched healthcare  
46 workforce. Lack of understanding amongst non-clinical staff on healthcare access can result

1  
2  
3 in patients not ever reaching clinicians, whilst disagreements within clinical teams may  
4 further detriment advocacy.  
5

6  
7 Our results do not support the argument that harm could be eliminated simply through  
8 improved staff awareness or 'better' implementation of regulations. Many patients were  
9 described as deterred from making contact with healthcare services, meaning that harm has  
10 already occurred before there is opportunity for advocacy. Within the cases described,  
11 harms occurring before healthcare was sought included late presentation requiring intensive  
12 care management, and two intrauterine deaths. There were several descriptions in the  
13 survey of children presenting late in their illnesses directly to the Emergency Department,  
14 even though accessing primary care earlier in their illness would not have been chargeable.  
15 This accords with the work done by the Equality and Human Rights Commission which  
16 suggests that it is not just specific restrictions, such as upfront charging, which act as a  
17 barrier to healthcare access, but the wider policies of the 'hostile environment'<sup>18,19</sup>.  
18  
19  
20  
21  
22  
23

24 Another aspect of the unworkability of the charging regulations is the ethical dilemma in  
25 which it places clinicians. Most respondents felt that the charging regulations are unfair, and  
26 in free text responses many commented that they felt charging conflicted with their own  
27 beliefs or the perceived values of the NHS. We did have one respondent detail a case where  
28 a person in the UK on holiday was charged for healthcare retrospectively, with the clinician  
29 believing this use of the charging regulations to have been appropriate. This was an outlier  
30 as the only reported case with a neutral or positive outcome, and so it did not fit into any of  
31 the wider qualitative themes.  
32  
33

34 The ethical issues are particularly stark when considering charging children and young  
35 people specifically. It would be likely to be considered a significant safeguarding issue if,  
36 through the actions of a parent or carer, a child were prevented from accessing treatment  
37 that is in their best interests<sup>20</sup>. Yet our survey documents multiple cases of children having  
38 such treatments delayed or denied due to charging. One respondent highlighted the  
39 impossible situation for a family whose child was being treated in intensive care: "*If the  
40 family had refused treatment we would have continued anyway in the best interest of the  
41 child even if it meant going to court. So in a way we were asking them to pay for something  
42 that was out of their control.... It was obviously a lot more than she was expecting or could  
43 afford, as [the mother] was distraught.*" Moreover, the routine sharing of data with the UK  
44 Home Office represents a breach of patient confidentiality and, whilst these regulations are  
45 being implemented, clinicians cannot guarantee confidentiality for their patients.  
46  
47  
48  
49  
50

51 The most significant limitation of this survey is the lack of the patients' voices. Unfortunately,  
52 as those affected are mostly in precarious situations in the UK, they are often scared and  
53 reluctant to participate in research or publicly describe their stories. Clinicians may have  
54 been more likely to respond if they had seen cases of charging in their practice or have pre-  
55 existing opinions on the topic, and this may have led to an overestimation in the percentage  
56 of clinicians who have seen charging, or consequent harm, in their practice. In the free text  
57 answers, respondents were instructed to keep cases vague to ensure patient confidentiality  
58 would not be breached - meaning that the full extent of the impact on those patients could  
59  
60

1  
2  
3 not always be fully described. We also cannot exclude the possibility that where descriptions  
4 were very brief, two different clinicians may have been referring to the same patient case,  
5 although the researchers reviewing the data found that the descriptions of the cases largely  
6 did not suggest overlap.  
7  
8  
9

10  
11 The UK differs from comparable European countries, including France, Spain, Sweden and  
12 Italy, as being more restrictive in healthcare access for undocumented migrant children, with  
13 several European countries providing equal health rights to all children regardless of  
14 migration status<sup>21</sup>. An exemption from charging for all children and pregnant women would  
15 bring the UK into line with neighbouring countries and reduce the significant safeguarding  
16 implications of the current policy. However, the evidence presented here suggests that  
17 reversing the charging regulations for children and pregnant women alone will not be  
18 sufficient to stop their impact on children. Even if children were exempt from NHS charging,  
19 these regulations and the presence of 'hostile environment' policies may still stop families  
20 from bringing children for healthcare. Furthermore, even if the children themselves can  
21 receive free healthcare, charging of their family members can lead to catastrophic health  
22 expenditure or avoidable disability which may cause or exacerbate destitution<sup>22</sup>.  
23  
24  
25  
26  
27  
28  
29

30  
31 Our results are convergent with previous research carried out by the Equality and Human  
32 Rights Commission, which looked at the existing evidence on access to healthcare for  
33 migrants in the UK<sup>20,21</sup>. The evidence in their reports is mostly drawn from focus group  
34 work with migrants, and from the reports of third sector organisations. There is a large  
35 overlap in key themes, particularly with regards to fear, staff misinterpretation of regulations  
36 acting as a barrier, and the outcome of late presentation. A notable key theme present in  
37 other research but not prominent in our results was that of language barriers being a  
38 significant obstacle to accessing healthcare. As our survey was based on healthcare staff  
39 report rather than direct patient experience, staff may be under-recognising the barrier this  
40 creates to patients.  
41  
42  
43  
44  
45  
46

47 In addition to the convergent themes, our results add additional themes not reported in  
48 earlier work. This includes healthcare staff themselves finding the regulations distressing  
49 and against their own values. They also highlight specific safeguarding and ethical issues  
50 arising from restricting healthcare to children. As our data comes from clinicians and is  
51 largely drawn from secondary care experiences, the harms may be more extensive.  
52  
53  
54

55  
56 Our results appear to contradict the December 2018 statement from the UK Department of  
57 Health and Social Care that their internal evidence collection of the impact of NHS charging  
58 regulations, which has been kept confidential, did not find any evidence of harm<sup>23</sup>. The  
59  
60

1  
2  
3 awareness of this review amongst our respondents was low (29%), suggesting there may  
4 have been a limitation in its reach to front line clinicians.  
5  
6  
7

## 8 Conclusion and Recommendations

10  
11 Healthcare professionals are increasingly being asked to fulfill roles they are not mandated  
12 or trained for, and to potentially compromise their own values and beliefs. They have told us  
13 that they are seeing harm to the NHS, and to patients - many of whom are particularly  
14 vulnerable - as a result of policies introduced to create a 'hostile environment' for migrants.  
15 Our survey results also highlight a breach of the UK's commitment to the UNCRC, as we  
16 have recorded clear examples of violations to article 24 on children's right to good health  
17 and healthcare access.  
18  
19

20  
21  
22 We therefore recommend:

### 23 **Revoking current NHS charging regulations**

24  
25 We believe there is sufficient evidence of harm to health and wellbeing for the current NHS  
26 charging regulations to be revoked, thereby restoring the UK's commitment to Universal  
27 Health Coverage. The current government should urgently suspend the charging regulations  
28 and commission a transparent independent review of their impact – using any harms that  
29 have been identified as a basis for a policy environment that upholds migrants' health and  
30 human rights.  
31  
32  
33  
34  
35  
36

### 37 **Adding to the evidence base**

38  
39 Collecting further evidence of the impacts of the current NHS charging regulations will likely  
40 strengthen this call for action. A fully independent review of the charging regulations should  
41 be commissioned, to robustly assess their impact on patients and professionals. We also  
42 encourage the Department of Health and Social Care to anonymously publish the data from  
43 their previous review of the impact of NHS charging regulations for comparison and  
44 validation against our data set.  
45  
46  
47

48 We recommend other health professionals carry out similar surveys and a case collection  
49 process within their communities of practice, and that other Medical Royal Colleges follow  
50 the example of the RCPCH in supporting them to do so. The RCPCH will continue to host an  
51 online evidence submission for cases where the charging regulations have impacted patient  
52 care or outcomes and encourage health professionals to contribute<sup>24</sup>.  
53  
54  
55  
56  
57  
58  
59  
60

## References

1. Department of Health and Social Care, Directorate of Acute Care & Workforce/Provider Efficiency & Productivity/Cost Recovery Programme/13790. Guidance on implementing the overseas visitor charging regulations. (2018)
2. Taylor, R. Impact of 'Hostile Environment' Policy Debate on 14 June 2018, House of Lords Library Briefing. (2018)
3. UN General Assembly. *Convention on the Rights of the Child*. United Nations, Treaty Series, vol. 1577, p. 3. (1989)
4. United Kingdom Parliament, House of Commons. Immigration Act 2014 c.22. (2014)
5. Lock, D. Q. Overseas visitors, asylum seekers and others: Who is entitled to access NHS services free of charges and who is required to pay charges for NHS services? (2017)
6. Department of Health and Social Care, Directorate of Acute Care & Workforce/Provider Efficiency & Productivity/Cost Recovery Programme/ 13790. Making a fair contribution: government response to the consultation on the extension of charging overseas visitors and migrants using the NHS in England. (2017).
7. Doctors of the World. Registration Refused: A study on access to GP registration in England. (2017)
8. Dexter, Z., Capron, L. & Gregg, L. Making Life Impossible - How the needs of destitute migrant children are going unmet. The Children's Society. (2016)
9. Sigona, N. & Hughes, V. No Way Out, No Way In. Irregular Migrant Children and

- 1  
2  
3 Families in the UK. ESRC Centre on Migration, Policy and Society, University of  
4  
5 Oxford: Research Report. (2012)  
6  
7  
8  
9 [10.](#) Academy of Medical Royal Colleges. NHS charges for overseas visitor regulations:  
10 A statement from the Academy of Medical Royal Colleges. (2019)  
11  
12  
13  
14 11. Ritchie, J. & Spencer, L. 'Qualitative data analysis for applied policy research' in  
15 Analyzing qualitative data. Taylor & Francis, edited by Bryman, A. & Burgess R. G.,  
16 p 173–194. (1994)  
17  
18  
19  
20  
21 12. Vargas-Silva, C. & Rienzo, C. Migrants in the UK: An Overview. Migration  
22 Observatory, University of Oxford: Briefing Paper. (2019)  
23  
24  
25  
26 13. Thaddeus, S. & Maine, D. Too far to walk: maternal mortality in context. Soc. Sci.  
27 Med. 1982 38, 1091–1110. (1994)  
28  
29  
30  
31  
32 14. Calvello, E. J., Skog, A. P., Tenner, A. G. & Wallis, L. A. Applying the lessons of  
33 maternal mortality reduction to global emergency health. Bull. World Health Organ.  
34 93, 417–423. (2015)  
35  
36  
37  
38  
39 15. Wilmot, E., Yotebieng, M., Norris, A. & Ngabo, F. Missed Opportunities in Neonatal  
40 Deaths in Rwanda: Applying the Three Delays Model in a Cross-Sectional Analysis  
41 of Neonatal Death. Matern. Child Health J. 21, 1121–1129. (2017)  
42  
43  
44  
45  
46 16. Combs Thorsen, V., Sundby, J. & Malata, A. Piecing together the maternal death  
47 puzzle through narratives: the three delays model revisited. PloS One 7, e52090.  
48 (2012)  
49  
50  
51  
52  
53 17. Koss, M. P., & Marks, J. S. Relationship of childhood abuse and household  
54 dysfunction to many of the leading causes of death in adults: The adverse childhood  
55 experiences (ACE) study. American Journal of Preventative Medicine, 14(4), 245-  
56 258. (1998)  
57  
58  
59  
60



- 1  
2  
3 18. Nellums, D. L. B. et al. The lived experiences of access to healthcare for people  
4 seeking and refused asylum. Equality and Human Rights Commission: Research  
5 Report 122. (2018)  
6  
7  
8  
9  
10  
11 19. Nellums, D. L. B. et al. Access to healthcare for people seeking and refused asylum  
12 in Great Britain. Equality and Human Rights Commission: Research Report 121.  
13 (2018)  
14  
15  
16  
17  
18 [20.](#) General Medical Council. Principles for protecting children and young people,  
19 Paragraph 1. (2018)  
20  
21  
22  
23 [21.](#) Medecins du Monde. Access to Healthcare in 16 European Countries: Legal Report.  
24 (2017)  
25  
26  
27  
28 22. Meessen, B. et al. Editorial: Iatrogenic poverty. Trop. Med. Int. Health 8, 581–584.  
29 (2003)  
30  
31  
32  
33 23. Department of Health and Social Care. Review of amendments made to the NHS  
34 Overseas Visitor Charging Regulations in 2017: Written statement in the United  
35 Kingdom Parliament, HCWS1174. (2019)  
36  
37  
38  
39  
40 24. Royal College of Paediatrics and Child Health. Evidence collection portal for NHS  
41 charging regulations. Available at: [www.rcpch.ac.uk/nhs-charging-regulations](http://www.rcpch.ac.uk/nhs-charging-regulations).  
42 (Accessed January 2020)  
43  
44  
45  
46  
47  
48  
49  
50  
51  
52  
53  
54  
55  
56  
57  
58  
59  
60

1  
2  
3  
4  
5  
6  
7  
8  
9  
10  
11  
12  
13  
14  
15  
16  
17  
18  
19  
20  
21  
22  
23  
24  
25  
26  
27  
28  
29  
30  
31  
32  
33  
34  
35  
36  
37  
38  
39  
40  
41  
42  
43  
44  
45  
46  
47  
48  
49  
50  
51  
52  
53  
54  
55  
56  
57  
58  
59  
60

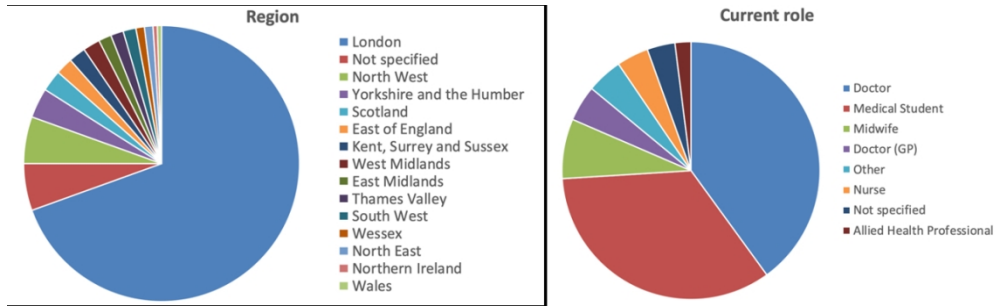

## Healthcare access for children and families on the move and migrants

### Appendix 1:

#### Definitions

|                                    |                                                                                                                                                                                                                                                                                                                                                                                                              |
|------------------------------------|--------------------------------------------------------------------------------------------------------------------------------------------------------------------------------------------------------------------------------------------------------------------------------------------------------------------------------------------------------------------------------------------------------------|
| Undocumented migrant               | Migrants whose immigration status is unresolved making them 'undocumented'. This is a fluid status that can evolve with changes in government immigration policy, and changes in personal circumstances.<br><br>Note: In the case of children, status often depends on immigration status of parents.                                                                                                        |
| NHS Charging regulations           | Refers to the National Health Service (Charges to Overseas Visitors) Regulations 2015, the National Health Services (Charges to Overseas Visitors) (Amendment) Regulations 2015 and the National Health Service (Charges to Overseas Visitors) (Amendment) Regulations 2017<br><br>These are the government regulations on what NHS services are chargeable, who can be charged, and how to implement these. |
| 'Hostile environment' <sup>2</sup> | The UK Home Office hostile environment policy is a set of administrative and legislative measures designed to make staying in the <a href="#">United Kingdom</a> as difficult as possible for people without <a href="#">leave to remain</a> , in the hope that they may " <a href="#">voluntarily leave</a> ".                                                                                              |

1  
2  
3 Healthcare access for children and families on the move and migrants  
4  
5  
6  
7  
8  
9  
10  
11  
12  
13  
14  
15  
16  
17  
18  
19  
20  
21  
22  
23  
24  
25  
26  
27  
28  
29  
30  
31  
32  
33  
34  
35  
36  
37  
38  
39  
40  
41  
42  
43  
44  
45  
46  
47  
48  
49  
50  
51  
52  
53  
54  
55  
56  
57  
58  
59  
60

Confidential: For Review Only

## Appendix 2

### Survey questions:

1. What is your current job title?
2. Where do you work?
3. To what extent do you agree with the following statements (1 being strongly disagree and 5 being strongly agree)?
  - 3.1. I am confident in determining who is chargeable for NHS care
  - 3.2. I am confident I know the exemptions to the charging regulations with regards to certain migrant groups
  - 3.3. I am confident I know the exemptions to the charging regulations with regards to certain medical conditions
  - 3.4. I am confident in understanding which NHS services for children and young people are free at point of delivery
  - 3.5. I am confident in understanding which NHS services for children and young people are chargeable up front
  - 3.6. I am confident in understanding which NHS services for children and young people are chargeable retrospectively
  - 3.7. I am confident my indemnity would provide me with protection if a patient under my care had their healthcare delayed / withheld as a result of the regulations
  - 3.8. I am confident the GMC would provide me with protection if a patient under my care had their healthcare delayed / withheld as a result of the regulations, and their health subsequently deteriorated
  - 3.9. I am confident in defining which aspects of healthcare are 'urgent' or 'immediately necessary' to inform whether treatment will be withheld before payment
  - 3.10. I am confident in how to advocate for a patient who is incorrectly being asked to pay or delay treatment related to immigration status
  - 3.11. I feel that the current NHS charging regulations are fair
  - 3.12. I believe healthcare professionals should play a role in implementing charging regulations in the NHS
4. Do you know any examples of how the NHS charging regulations have positively or negatively impacted patient's health and the care they have received?
  - 4.1. Healthcare seeking: Please describe experiences of cases you are aware of in which the introduction of charging, fear of charges / detention / deportation or reduction of eligibility has impacted on a patient's access to healthcare (e.g. being deterred or delayed from accessing healthcare)
  - 4.2. Healthcare withheld: Please describe any cases you have been involved with in which a patient has had healthcare withheld because of the charging regulations detailed above
  - 4.3. Wider impact: Please describe any other health or socioeconomic impact on patients due to up front charging, fear of charging or immigration status. This may include loss of housing, non attendance at education, ethnic profiling, etc.
5. Do you have any other comments about the impact of the charging regulations and immigration act on health, wellbeing or health-seeking behaviours?
6. Were you aware that there was a Department of Health (DoH) review into the impact of the charging regulations?
7. Do you think that there should be an independent review conducted?
8. Have you had training on this topic before?

- 1  
2  
3 8.1. If yes, what training did you attend?  
4 9. Would you be interested in attending training on this topic?  
5  
6  
7  
8  
9  
10  
11  
12  
13  
14  
15  
16  
17  
18  
19  
20  
21  
22  
23  
24  
25  
26  
27  
28  
29  
30  
31  
32  
33  
34  
35  
36  
37  
38  
39  
40  
41  
42  
43  
44  
45  
46  
47  
48  
49  
50  
51  
52  
53  
54  
55  
56  
57  
58  
59  
60

Confidential: For Review Only

## Healthcare access for children and families on the move and migrants

### Appendix 3

Framework developed for analysis:

| + Overarching theme |      |
|---------------------|------|
| Designation         | Code |
|                     |      |

#### Culture of fear

|    |                                          |
|----|------------------------------------------|
| A1 | Fear of charging                         |
| A2 | Fear of deportation                      |
| A3 | Fear of criminalisation                  |
| A4 | Fear of data sharing                     |
| A5 | Fear of financial distress / destitution |
| A6 | Fear of impact on immigration status     |
| A7 | Basis of fear not specified              |

#### Delay in care access

|    |                                                    |
|----|----------------------------------------------------|
| C1 | <u>Non attendance</u> at healthcare facilities     |
| C2 | Perpetuation of migrant deterrence from healthcare |
| C3 | Cause of delay not specified                       |

#### Delay in care delivery

|    |                                           |
|----|-------------------------------------------|
| D1 | Due to excess bureaucracy                 |
| D2 | Due to need to source financing           |
| D3 | Due to issues clarifying migration status |
| D4 | Due to issues clarifying eligibility      |
| D5 | Cause of delay not specified              |

#### Impact on health outcomes

|     |                                             |
|-----|---------------------------------------------|
| B1  | Death                                       |
| B2  | Foetal death                                |
| B3  | Health emergency                            |
| B4  | Late diagnoses                              |
| B5  | Preventable complications                   |
| B6  | Inadequate follow up                        |
| B7  | Long term health consequences               |
| B8  | Inability to access preventative healthcare |
| B9  | Reduced quality of care                     |
| B10 | Impact on population health                 |
| B11 | Delayed antenatal care                      |
| B12 | <u>Non compliance</u> with care             |
| B13 | Impact on health outcomes not specified     |

#### Denial of healthcare

|    |                                    |
|----|------------------------------------|
| E1 | Lack of upfront payment            |
| E2 | Inappropriate denial when entitled |
| E3 | Unseen consequences                |
| E4 | Cause of denial not specified      |

**Issues determining eligibility**

|    |                                                           |
|----|-----------------------------------------------------------|
| F1 | Inadequate record keeping                                 |
| F2 | Staff unaware of exemptions                               |
| F3 | Non clinical staff determining entitlements               |
| F4 | Issue determining eligibility was difficult not specified |

**Lack of knowledge of charging regulations**

|    |                                                            |
|----|------------------------------------------------------------|
| H1 | Rumours and misinformation in migrant communities          |
| H2 | Non clinical staff gatekeeping access to care              |
| H3 | Ambiguity of charging regulations                          |
| H4 | Inappropriate charging                                     |
| H5 | Overseas visitors teams acting independently of clinicians |
| H6 | Poor communication around patient's entitlements           |

**Wider context of the hostile environment**

|    |                                    |
|----|------------------------------------|
| I1 | Distress for patient and families  |
| I2 | Withdrawal from education          |
| I3 | Abandonment of children            |
| I4 | Malnourishment                     |
| I5 | Impact on housing                  |
| I6 | Unsafe repatriation                |
| I7 | Charging perpetuating destitution  |
| I8 | Lack of access to support services |
| I9 | Economic fallout of ill health     |

**Difficulty assessing eligibility**

|     |                                                            |
|-----|------------------------------------------------------------|
| G1  | Building rapport to determine eligibility                  |
| G2  | Assessing cases of trafficking or slavery                  |
| G3  | Assessing cases of sexual and domestic violence            |
| G4  | Staff not trained to assess eligibility                    |
| G5  | Lack of patient capacity                                   |
| G6  | Evolving eligibility                                       |
| G7  | Complex legal status                                       |
| G8  | Ineligible residency                                       |
| G9  | Complexity of the health system                            |
| G10 | Reason determining eligibility was difficult not specified |

|     |                                                              |
|-----|--------------------------------------------------------------|
| I10 | Lack of appreciation of health needs by immigration services |
| I11 | Changing status to access healthcare                         |
| I12 | NHS debts affecting regularisation of status                 |
| I13 | Deviation from normal practice                               |
| I14 | Stigma                                                       |



**Wider impacts on clinical staff**

|    |                                                                                         |
|----|-----------------------------------------------------------------------------------------|
| J1 | Distress to NHS staff due to denying/delaying care                                      |
| J2 | NHS staff or their families unable to afford health surcharge/ access care              |
| J3 | Against the duties of healthcare staff as determined by their professional institutions |
| J4 | Antagonistic to personal views and values                                               |
| J5 | Personal fears or fears for families                                                    |
| J6 | Reputation                                                                              |
| J7 | No experience of patient charging                                                       |
| J8 | Acceptance of charging regulations                                                      |

**Wider impacts on the NHS**

|    |                                                             |
|----|-------------------------------------------------------------|
| K1 | Increased burden on A&E                                     |
| K2 | Increased burden on GP                                      |
| K3 | Increased healthcare resource use                           |
| K4 | Hypocrisy                                                   |
| K5 | Human rights breaches                                       |
| K6 | Futile charging                                             |
| K7 | Discharge difficulties / delays                             |
| K8 | Discord between health institutions                         |
| K9 | Increased financial costs of delayed care access / delivery |

**Clinicians as advocates**

|    |                                           |
|----|-------------------------------------------|
| L1 | Navigation of the health system           |
| L2 | Appealing / overriding charging decisions |

**Patient ethnicity**

|    |                  |
|----|------------------|
| M1 | Racism           |
| M2 | Racial profiling |

**Clinical conditions**

|    |                          |
|----|--------------------------|
| N1 | Cancer                   |
| N2 | Complex clinical cases   |
| N3 | Life threatening illness |
| N4 | Pregnancy                |
| N5 | Surgery                  |
| N6 | Chronic disease          |

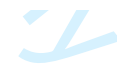

## Healthcare access for children and families on the move and migrants

### Appendix 4

| Theme                                                          | Definition                                                                                                                                                                                                                  |
|----------------------------------------------------------------|-----------------------------------------------------------------------------------------------------------------------------------------------------------------------------------------------------------------------------|
| 1. Fear of consequences of engagement in healthcare.           | Current NHS charging regulations contribute to a culture of fear within the healthcare environment, that makes patients unwilling or unable to engage in healthcare services.                                               |
| 2. Deterrence from healthcare                                  | Current NHS charging regulations deter migrants, and not just those who have irregular immigration status, from accessing healthcare.                                                                                       |
| 3. Delay in or denial of healthcare provision                  | Current NHS charging regulations have resulted in the delay or denial of healthcare deemed necessary by clinical staff, affecting patients of all eligibilities.                                                            |
| 4. Impact of charging regulations on patient health outcomes   | The current NHS charging regulations are having a detrimental impact on patient's health, due to deterrence from care, impact on the delivery of timely or quality care or by influencing the wider determinants of health. |
| 5. Current charging regulations unworkable                     | The current NHS charging regulations are unworkable in their current form, as both clinical and non-clinical staff are struggling to interpret and implement them in a standardised manner.                                 |
| 6. Impact of charging regulations on NHS                       | Current charging regulations are having negative impact on the National Health Service, bringing a financial and resource burden, and on its staff, causing emotional distress to those involved in patient care.           |
| 7. Context of the wider hostile environment influencing health | The current NHS charging regulations are just one policy used to create a 'hostile environment' for migrants, many of which can have an impact on health and wellbeing.                                                     |
