# Supplementary material for: Healthcare access for children and families on the move and migrants
Source: PubMed Central journal article supplement — BMJ Paediatr Open. 2020 Apr 14;4(1):e000588. doi: 10.1136/bmjpo-2019-000588 (PMC7213513; doi:10.1136/bmjpo-2019-000588), 2020-04-14
Supplement: bmjpo-2019-000588supp001.pdf [file bmjpo-2019-000588supp001.pdf]

## Healthcare access for children and families on the move and migrants

### Appendix 1:

#### Definitions

|                                    |                                                                                                                                                                                                                                                                                                                                                                                                                     |
|------------------------------------|---------------------------------------------------------------------------------------------------------------------------------------------------------------------------------------------------------------------------------------------------------------------------------------------------------------------------------------------------------------------------------------------------------------------|
| Undocumented migrant               | <p>Migrants whose immigration status is unresolved making them 'undocumented'. This is a fluid status that can evolve with changes in government immigration policy, and changes in personal circumstances.</p> <p>Note: In the case of children, status often depends on immigration status of parents.</p>                                                                                                        |
| NHS Charging regulations           | <p>Refers to the National Health Service (Charges to Overseas Visitors) Regulations 2015, the National Health Services (Charges to Overseas Visitors) (Amendment) Regulations 2015 and the National Health Service (Charges to Overseas Visitors) (Amendment) Regulations 2017</p> <p>These are the government regulations on what NHS services are chargeable, who can be charged, and how to implement these.</p> |
| 'Hostile environment' <sup>2</sup> | <p>The UK Home Office hostile environment policy is a set of administrative and legislative measures designed to make staying in the <a href="#">United Kingdom</a> as difficult as possible for people without <a href="#">leave to remain</a>, in the hope that they may "<a href="#">voluntarily leave</a>".</p>                                                                                                 |
