# Supplementary material for: Healthcare access for children and families on the move and migrants
Source: PubMed Central journal article supplement — BMJ Paediatr Open. 2020 Apr 14;4(1):e000588. doi: 10.1136/bmjpo-2019-000588 (PMC7213513; doi:10.1136/bmjpo-2019-000588), 2020-04-14
Supplement: bmjpo-2019-000588supp002.pdf [file bmjpo-2019-000588supp002.pdf]

## Healthcare access for children and families on the move and migrants

## Appendix 2

### Survey questions:

1. What is your current job title?
2. Where do you work?
3. To what extent do you agree with the following statements (1 being strongly disagree and 5 being strongly agree)?
  - 3.1. I am confident in determining who is chargeable for NHS care
  - 3.2. I am confident I know the exemptions to the charging regulations with regards to certain migrant groups
  - 3.3. I am confident I know the exemptions to the charging regulations with regards to certain medical conditions
  - 3.4. I am confident in understanding which NHS services for children and young people are free at point of delivery
  - 3.5. I am confident in understanding which NHS services for children and young people are chargeable up front
  - 3.6. I am confident in understanding which NHS services for children and young people are chargeable retrospectively
  - 3.7. I am confident my indemnity would provide me with protection if a patient under my care had their healthcare delayed / withheld as a result of the regulations
  - 3.8. I am confident the GMC would provide me with protection if a patient under my care had their healthcare delayed / withheld as a result of the regulations, and their health subsequently deteriorated
  - 3.9. I am confident in defining which aspects of healthcare are 'urgent' or 'immediately necessary' to inform whether treatment will be withheld before payment
  - 3.10. I am confident in how to advocate for a patient who is incorrectly being asked to pay or delay treatment related to immigration status
  - 3.11. I feel that the current NHS charging regulations are fair
  - 3.12. I believe healthcare professionals should play a role in implementing charging regulations in the NHS
4. Do you know any examples of how the NHS charging regulations have positively or negatively impacted patient's health and the care they have received?
  - 4.1. Healthcare seeking: Please describe experiences of cases you are aware of in which the introduction of charging, fear of charges / detention / deportation or reduction of eligibility has impacted on a patient's access to healthcare (e.g. being deterred or delayed from accessing healthcare)
  - 4.2. Healthcare withheld: Please describe any cases you have been involved with in which a patient has had healthcare withheld because of the charging regulations detailed above
  - 4.3. Wider impact: Please describe any other health or socioeconomic impact on patients due to up front charging, fear of charging or immigration status. This may include loss of housing, non attendance at education, ethnic profiling, etc.
5. Do you have any other comments about the impact of the charging regulations and immigration act on health, wellbeing or health-seeking behaviours?
6. Were you aware that there was a Department of Health (DoH) review into the impact of the charging regulations?
7. Do you think that there should be an independent review conducted?
8. Have you had training on this topic before?

- 8.1. If yes, what training did you attend?
9. Would you be interested in attending training on this topic?
