# Supplementary material for: Healthcare access for children and families on the move and migrants
Source: PubMed Central journal article supplement — BMJ Paediatr Open. 2020 Apr 14;4(1):e000588. doi: 10.1136/bmjpo-2019-000588 (PMC7213513; doi:10.1136/bmjpo-2019-000588), 2020-04-14
Supplement: bmjpo-2019-000588supp003.pdf [file bmjpo-2019-000588supp003.pdf]

## Healthcare access for children and families on the move and migrants

### Appendix 3

Framework developed for analysis:

| Overarching theme |      |
|-------------------|------|
| Designation       | Code |

#### Culture of fear

|    |                                          |
|----|------------------------------------------|
| A1 | Fear of charging                         |
| A2 | Fear of deportation                      |
| A3 | Fear of criminalisation                  |
| A4 | Fear of data sharing                     |
| A5 | Fear of financial distress / destitution |
| A6 | Fear of impact on immigration status     |
| A7 | Basis of fear not specified              |

#### Delay in care access

|    |                                                    |
|----|----------------------------------------------------|
| C1 | <u>Non attendance</u> at healthcare facilities     |
| C2 | Perpetuation of migrant deterrence from healthcare |
| C3 | Cause of delay not specified                       |

#### Delay in care delivery

|    |                                           |
|----|-------------------------------------------|
| D1 | Due to excess bureaucracy                 |
| D2 | Due to need to source financing           |
| D3 | Due to issues clarifying migration status |
| D4 | Due to issues clarifying eligibility      |
| D5 | Cause of delay not specified              |

#### Impact on health outcomes

|     |                                             |
|-----|---------------------------------------------|
| B1  | Death                                       |
| B2  | Foetal death                                |
| B3  | Health emergency                            |
| B4  | Late diagnoses                              |
| B5  | Preventable complications                   |
| B6  | Inadequate follow up                        |
| B7  | Long term health consequences               |
| B8  | Inability to access preventative healthcare |
| B9  | Reduced quality of care                     |
| B10 | Impact on population health                 |
| B11 | Delayed antenatal care                      |
| B12 | <u>Non compliance</u> with care             |
| B13 | Impact on health outcomes not specified     |

#### Denial of healthcare

|    |                                    |
|----|------------------------------------|
| E1 | Lack of upfront payment            |
| E2 | Inappropriate denial when entitled |
| E3 | Unseen consequences                |
| E4 | Cause of denial not specified      |

**Issues determining eligibility**

|    |                                                           |
|----|-----------------------------------------------------------|
| F1 | Inadequate record keeping                                 |
| F2 | Staff unaware of exemptions                               |
| F3 | Non clinical staff determining entitlements               |
| F4 | Issue determining eligibility was difficult not specified |

**Lack of knowledge of charging regulations**

|    |                                                            |
|----|------------------------------------------------------------|
| H1 | Rumours and misinformation in migrant communities          |
| H2 | Non clinical staff gatekeeping access to care              |
| H3 | Ambiguity of charging regulations                          |
| H4 | Inappropriate charging                                     |
| H5 | Overseas visitors teams acting independently of clinicians |
| H6 | Poor communication around patient's entitlements           |

**Wider context of the hostile environment**

|    |                                    |
|----|------------------------------------|
| I1 | Distress for patient and families  |
| I2 | Withdrawal from education          |
| I3 | Abandonment of children            |
| I4 | Malnourishment                     |
| I5 | Impact on housing                  |
| I6 | Unsafe repatriation                |
| I7 | Charging perpetuating destitution  |
| I8 | Lack of access to support services |
| I9 | Economic fallout of ill health     |

**Difficulty assessing eligibility**

|     |                                                            |
|-----|------------------------------------------------------------|
| G1  | Building rapport to determine eligibility                  |
| G2  | Assessing cases of trafficking or slavery                  |
| G3  | Assessing cases of sexual and domestic violence            |
| G4  | Staff not trained to assess eligibility                    |
| G5  | Lack of patient capacity                                   |
| G6  | Evolving eligibility                                       |
| G7  | Complex legal status                                       |
| G8  | Ineligible residency                                       |
| G9  | Complexity of the health system                            |
| G10 | Reason determining eligibility was difficult not specified |

|     |                                                              |
|-----|--------------------------------------------------------------|
| I10 | Lack of appreciation of health needs by immigration services |
| I11 | Changing status to access healthcare                         |
| I12 | NHS debts affecting regularisation of status                 |
| I13 | Deviation from normal practice                               |
| I14 | Stigma                                                       |

**Wider impacts on clinical staff**

|    |                                                                                         |
|----|-----------------------------------------------------------------------------------------|
| J1 | Distress to NHS staff due to denying/delaying care                                      |
| J2 | NHS staff or their families unable to afford health surcharge/ access care              |
| J3 | Against the duties of healthcare staff as determined by their professional institutions |
| J4 | Antagonistic to personal views and values                                               |
| J5 | Personal fears or fears for families                                                    |
| J6 | Reputation                                                                              |
| J7 | No experience of patient charging                                                       |
| J8 | Acceptance of charging regulations                                                      |

**Wider impacts on the NHS**

|    |                                                             |
|----|-------------------------------------------------------------|
| K1 | Increased burden on A&E                                     |
| K2 | Increased burden on GP                                      |
| K3 | Increased healthcare resource use                           |
| K4 | Hypocrisy                                                   |
| K5 | Human rights breaches                                       |
| K6 | Futile charging                                             |
| K7 | Discharge difficulties / delays                             |
| K8 | Discord between health institutions                         |
| K9 | Increased financial costs of delayed care access / delivery |

**Clinicians as advocates**

|    |                                           |
|----|-------------------------------------------|
| L1 | Navigation of the health system           |
| L2 | Appealing / overriding charging decisions |

**Patient ethnicity**

|    |                  |
|----|------------------|
| M1 | Racism           |
| M2 | Racial profiling |

**Clinical conditions**

|    |                          |
|----|--------------------------|
| N1 | Cancer                   |
| N2 | Complex clinical cases   |
| N3 | Life threatening illness |
| N4 | Pregnancy                |
| N5 | Surgery                  |
| N6 | Chronic disease          |
