# Supplementary material for: Healthcare access for children and families on the move and migrants
Source: PubMed Central journal article supplement — BMJ Paediatr Open. 2020 Apr 14;4(1):e000588. doi: 10.1136/bmjpo-2019-000588 (PMC7213513; doi:10.1136/bmjpo-2019-000588), 2020-04-14
Supplement: bmjpo-2019-000588supp004.pdf [file bmjpo-2019-000588supp004.pdf]

## Healthcare access for children and families on the move and migrants

### Appendix 4

| Theme                                                          | Definition                                                                                                                                                                                                                  |
|----------------------------------------------------------------|-----------------------------------------------------------------------------------------------------------------------------------------------------------------------------------------------------------------------------|
| 1. Fear of consequences of engagement in healthcare.           | Current NHS charging regulations contribute to a culture of fear within the healthcare environment, that makes patients unwilling or unable to engage in healthcare services.                                               |
| 2. Deterrence from healthcare                                  | Current NHS charging regulations deter migrants, and not just those who have irregular immigration status, from accessing healthcare.                                                                                       |
| 3. Delay in or denial of healthcare provision                  | Current NHS charging regulations have resulted in the delay or denial of healthcare deemed necessary by clinical staff, affecting patients of all eligibilities.                                                            |
| 4. Impact of charging regulations on patient health outcomes   | The current NHS charging regulations are having a detrimental impact on patient's health, due to deterrence from care, impact on the delivery of timely or quality care or by influencing the wider determinants of health. |
| 5. Current charging regulations unworkable                     | The current NHS charging regulations are unworkable in their current form, as both clinical and non-clinical staff are struggling to interpret and implement them in a standardised manner.                                 |
| 6. Impact of charging regulations on NHS                       | Current charging regulations are having negative impact on the National Health Service, bringing a financial and resource burden, and on its staff, causing emotional distress to those involved in patient care.           |
| 7. Context of the wider hostile environment influencing health | The current NHS charging regulations are just one policy used to create a 'hostile environment' for migrants, many of which can have an impact on health and wellbeing.                                                     |
